# Supplementary material for: Optimal decision-making in high-throughput virtual screening pipelines
Source: PubMed Central journal article supplement — Patterns (N Y). 2023 Nov 3;4(11):100875. doi: 10.1016/j.patter.2023.100875 (PMC10682755; doi:10.1016/j.patter.2023.100875), 2023-11-03
Supplement: mmc1.pdf [file mmc1.pdf]

**Patterns, Volume 4**

**Supplemental information**

**Optimal decision-making in high-throughput  
virtual screening pipelines**

**Hyun-Myung Woo, Xiaoning Qian, Li Tan, Shantenu Jha, Francis J. Alexander, Edward R. Dougherty, and Byung-Jun Yoon**

# Performance evaluations of the high-throughput virtual screening pipelines with various covariance matrices

## Case 1: Uniform correlation between the surrogate models

$$p(y_1, y_2, y_3, y_4) \sim \mathcal{N} \left( \boldsymbol{\mu} = \mathbf{0}, \boldsymbol{\Sigma} = \begin{bmatrix} 1 & 0.2 & 0.2 & 0.2 \\ 0.2 & 1 & 0.2 & 0.2 \\ 0.2 & 0.2 & 1 & 0.2 \\ 0.2 & 0.2 & 0.2 & 1 \end{bmatrix} \right) \quad (1)$$

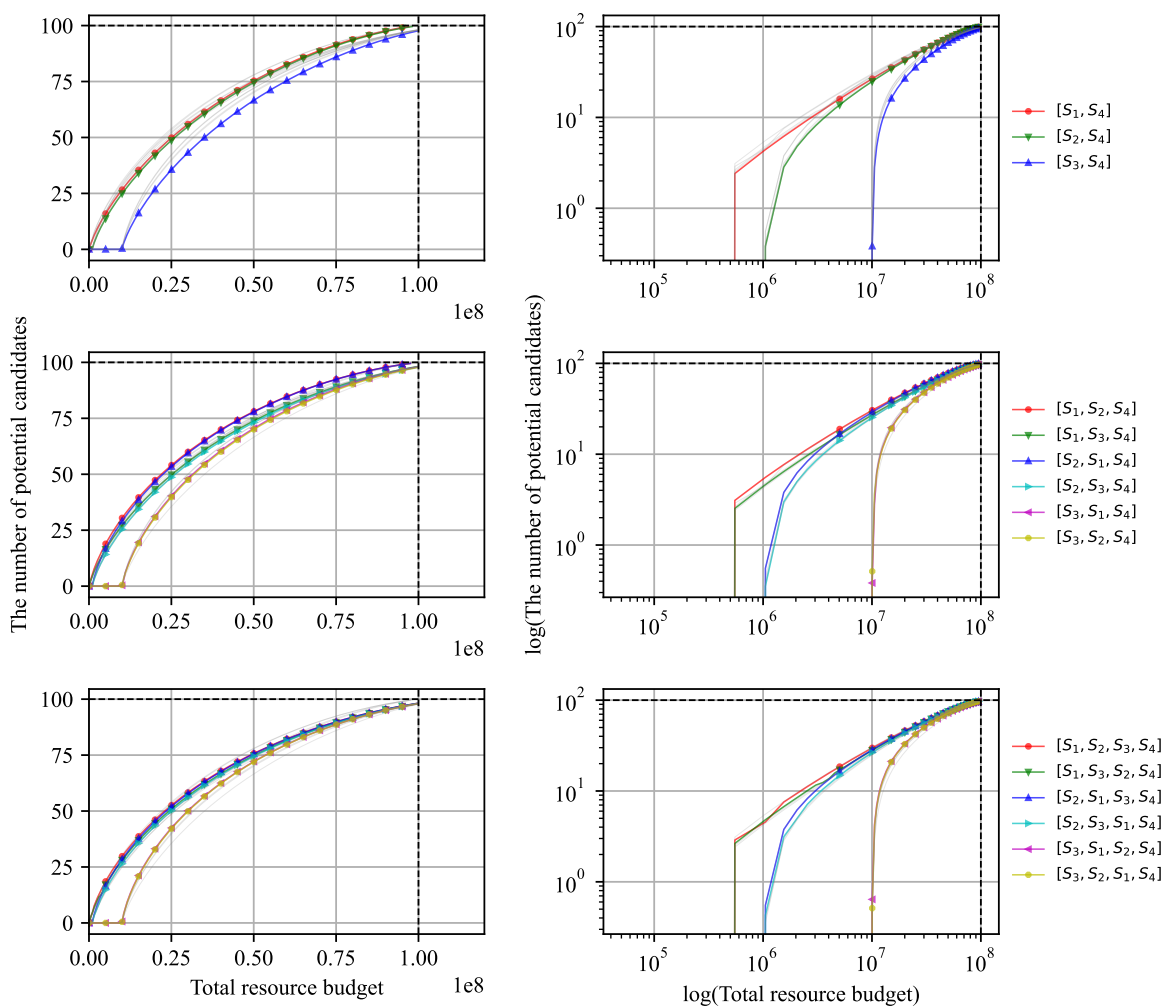

Figure S1: Performance comparison of the optimized high-throughput virtual screening pipelines in terms of discovery capability.

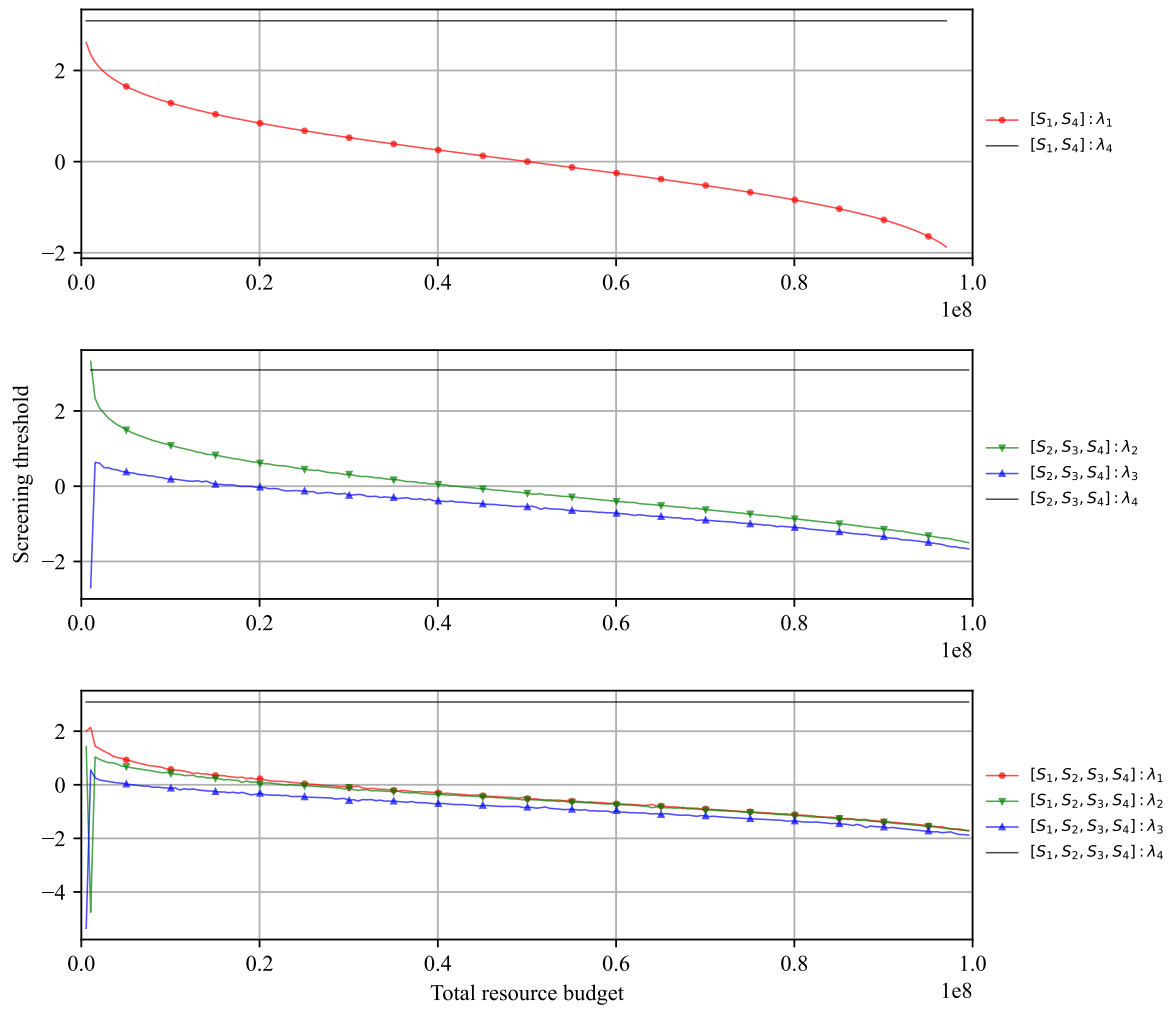

Figure S2: Screening thresholds of the optimized pipelines.

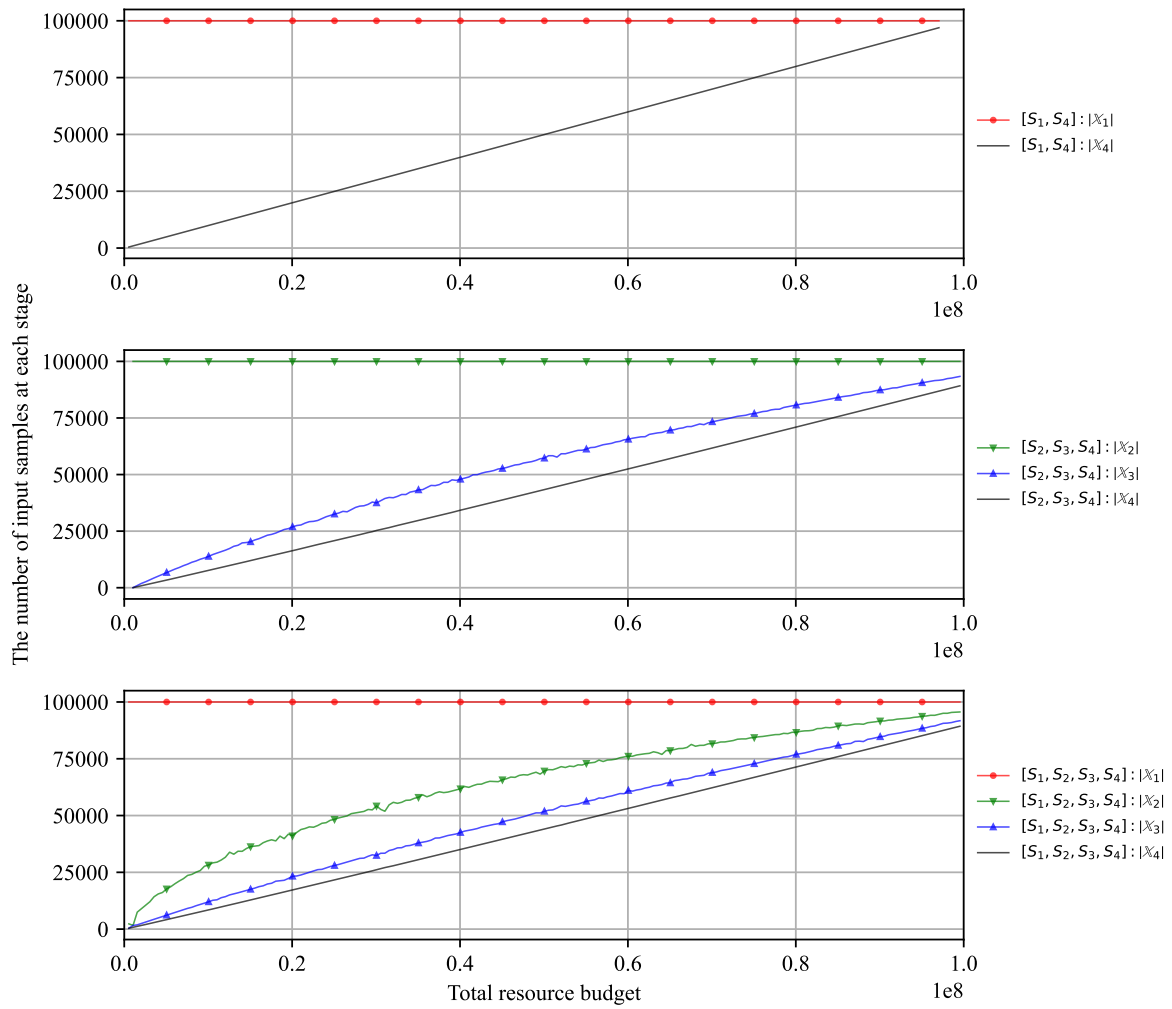

Figure S3: The number of input samples at each stage.

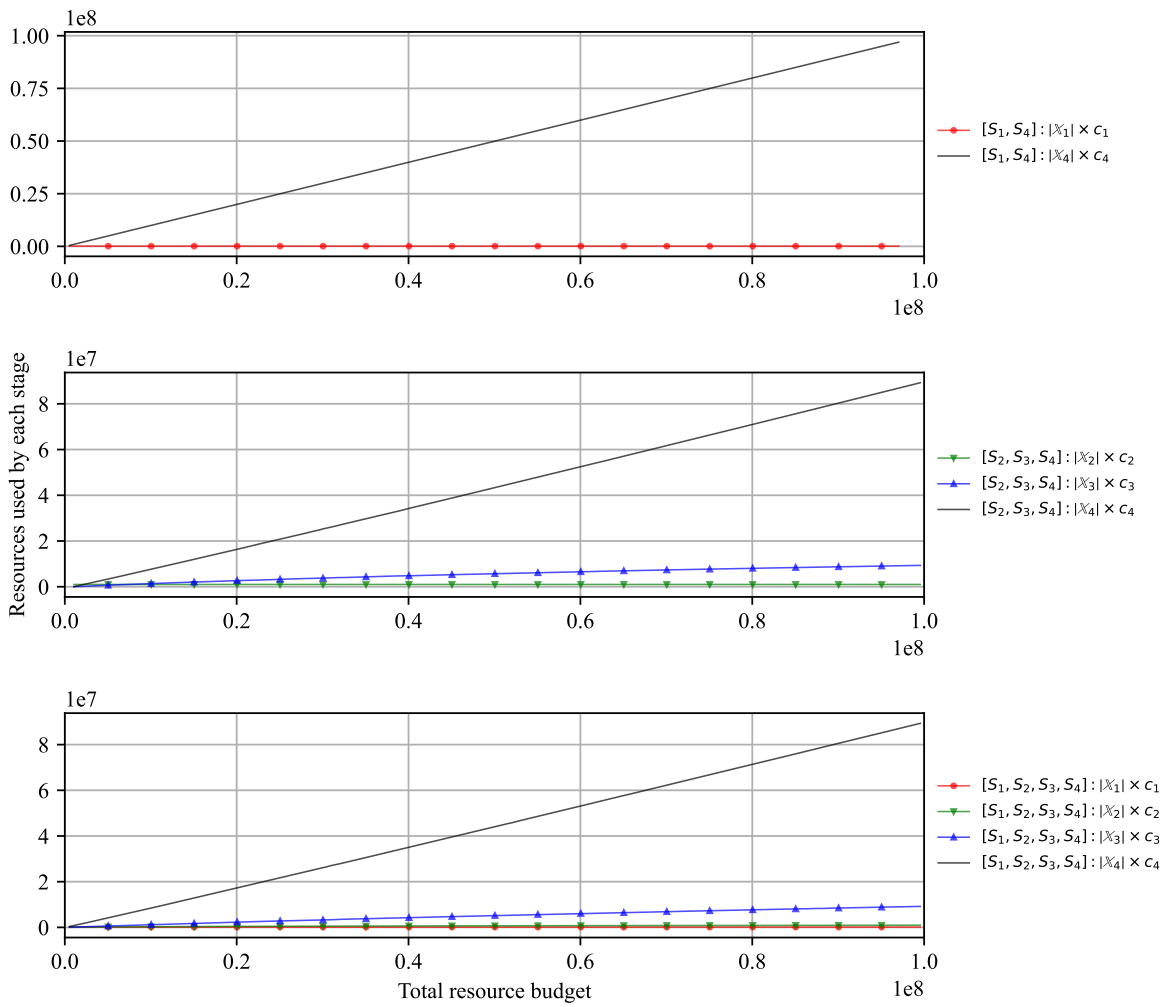

Figure S4: Resources used by each stage.

$$p(y_1, y_2, y_3, y_4) \sim \mathcal{N} \left( \boldsymbol{\mu} = \mathbf{0}, \boldsymbol{\Sigma} = \begin{bmatrix} 1 & 0.5 & 0.5 & 0.5 \\ 0.5 & 1 & 0.5 & 0.5 \\ 0.5 & 0.5 & 1 & 0.5 \\ 0.5 & 0.5 & 0.5 & 1 \end{bmatrix} \right) \quad (2)$$

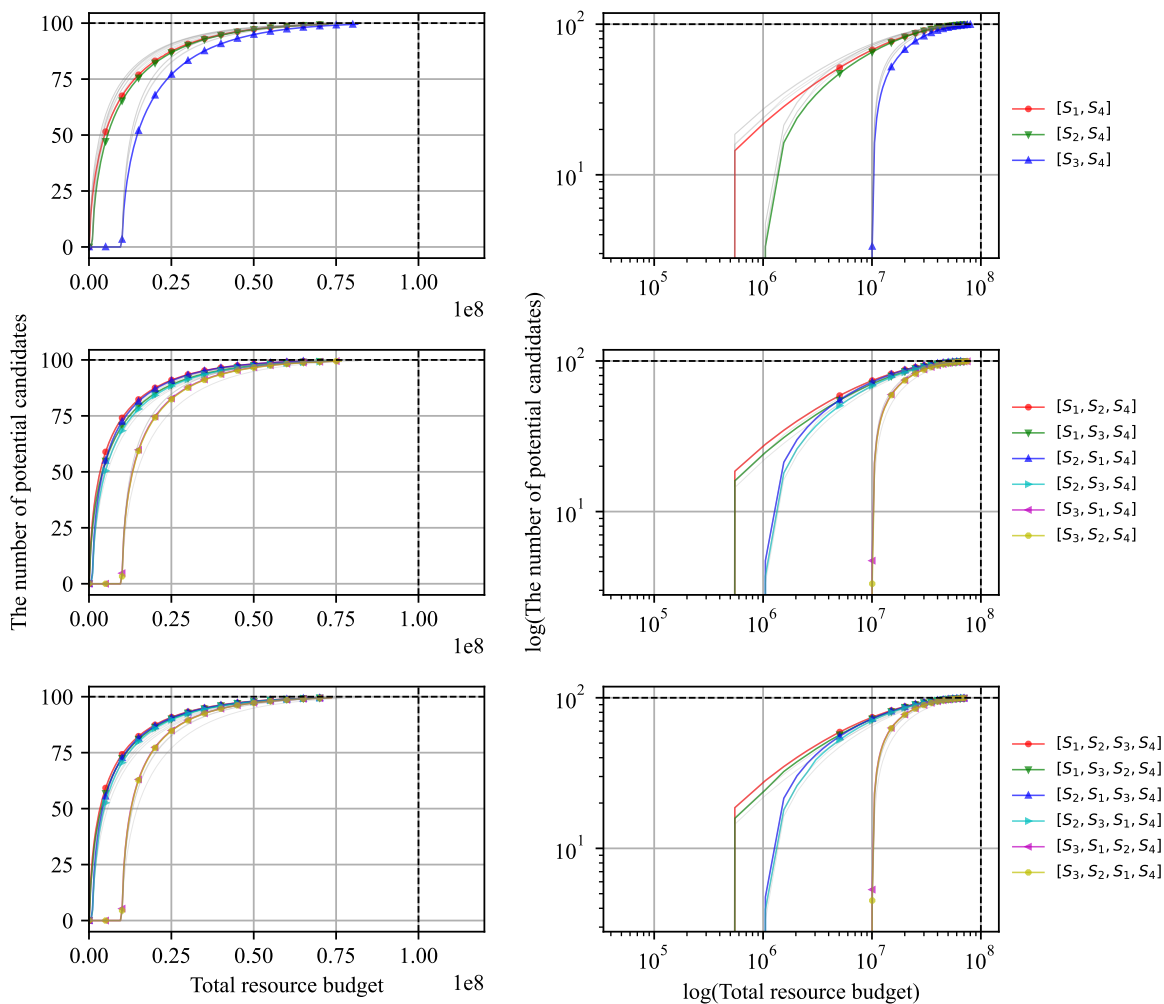

Figure S5: **Performance comparison of the optimized high-throughput virtual screening pipelines in terms of discovery capability.**

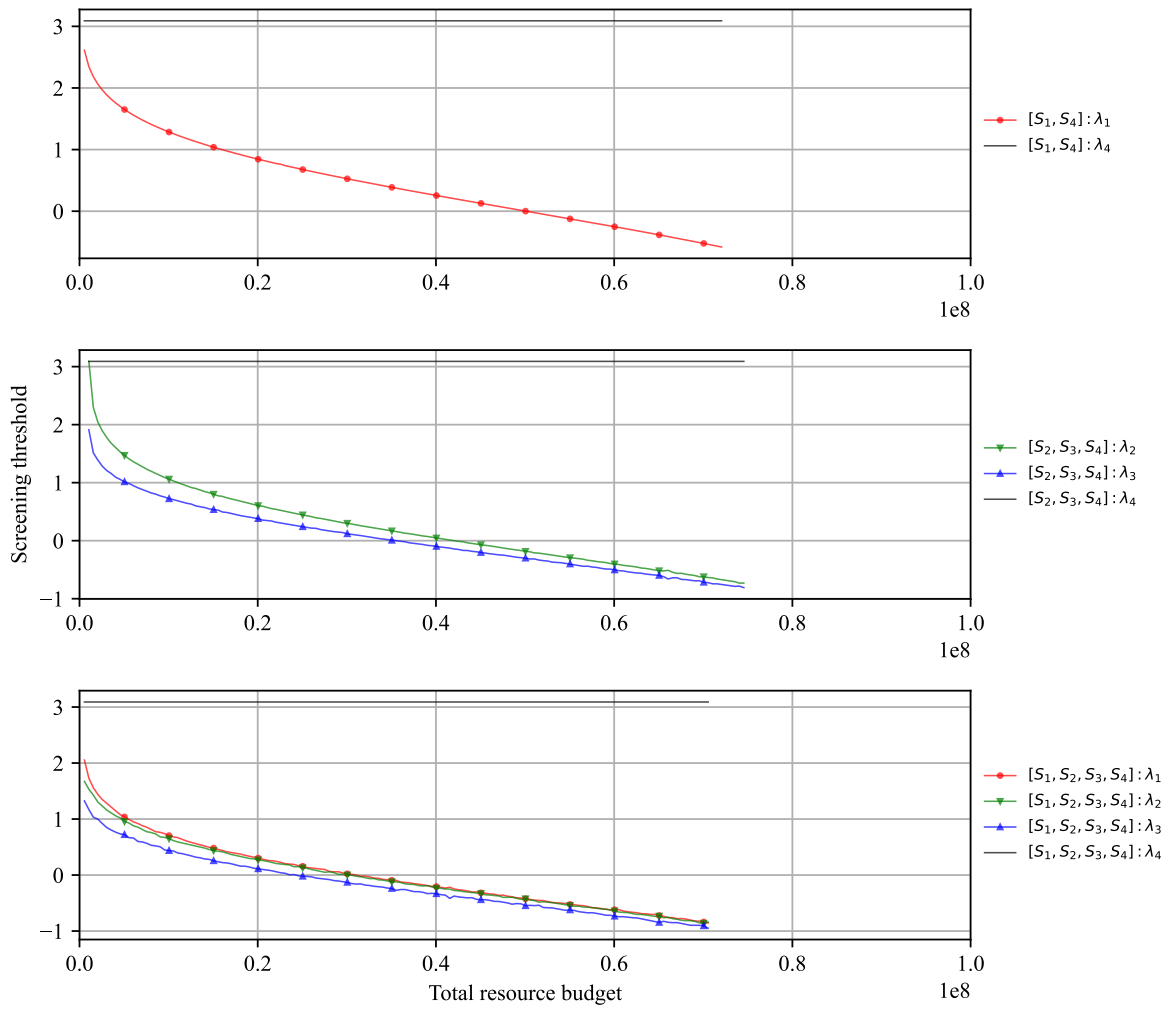

Figure S6: Screening thresholds of the optimized pipelines.

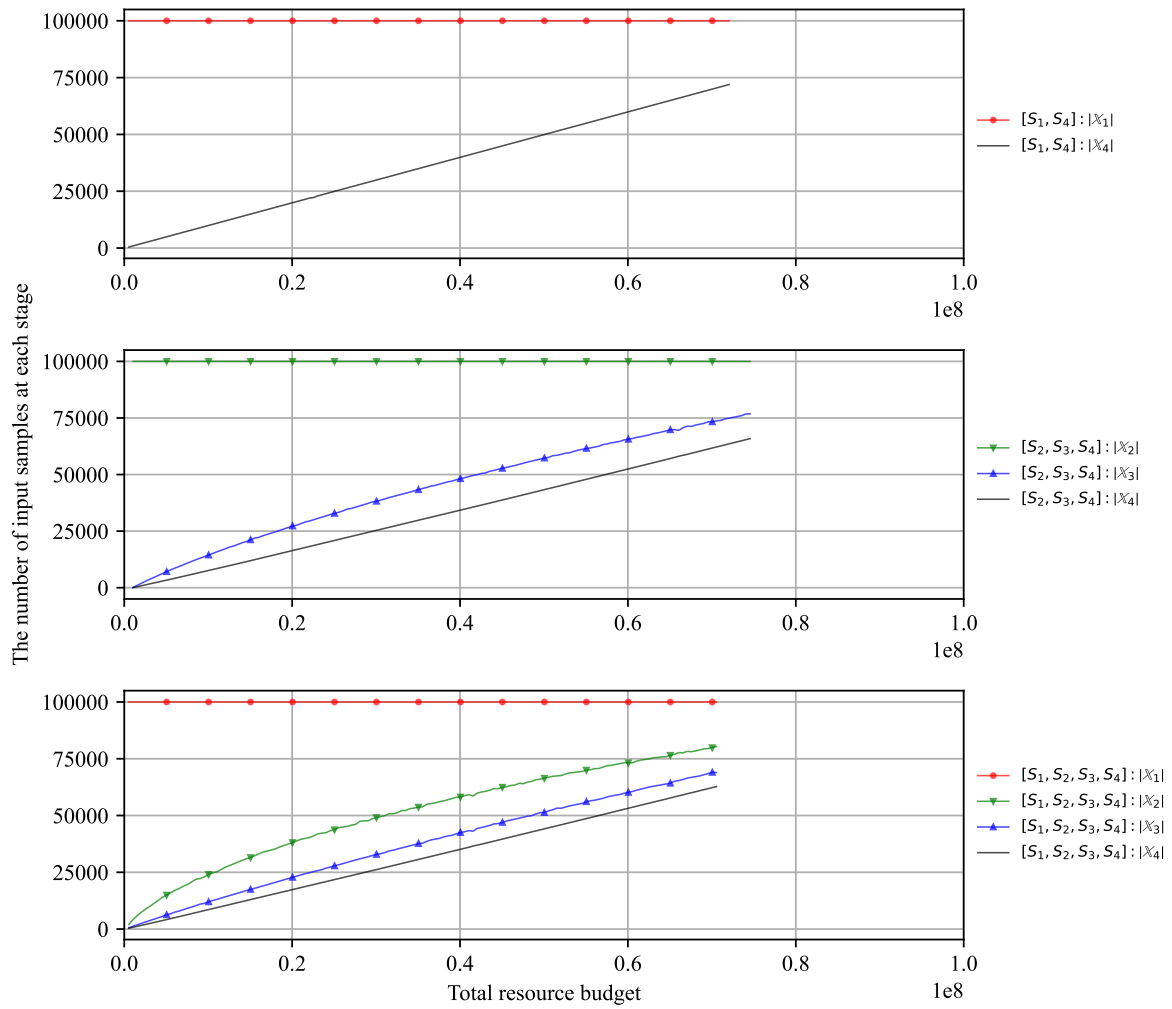

Figure S7: The number of input samples at each stage.



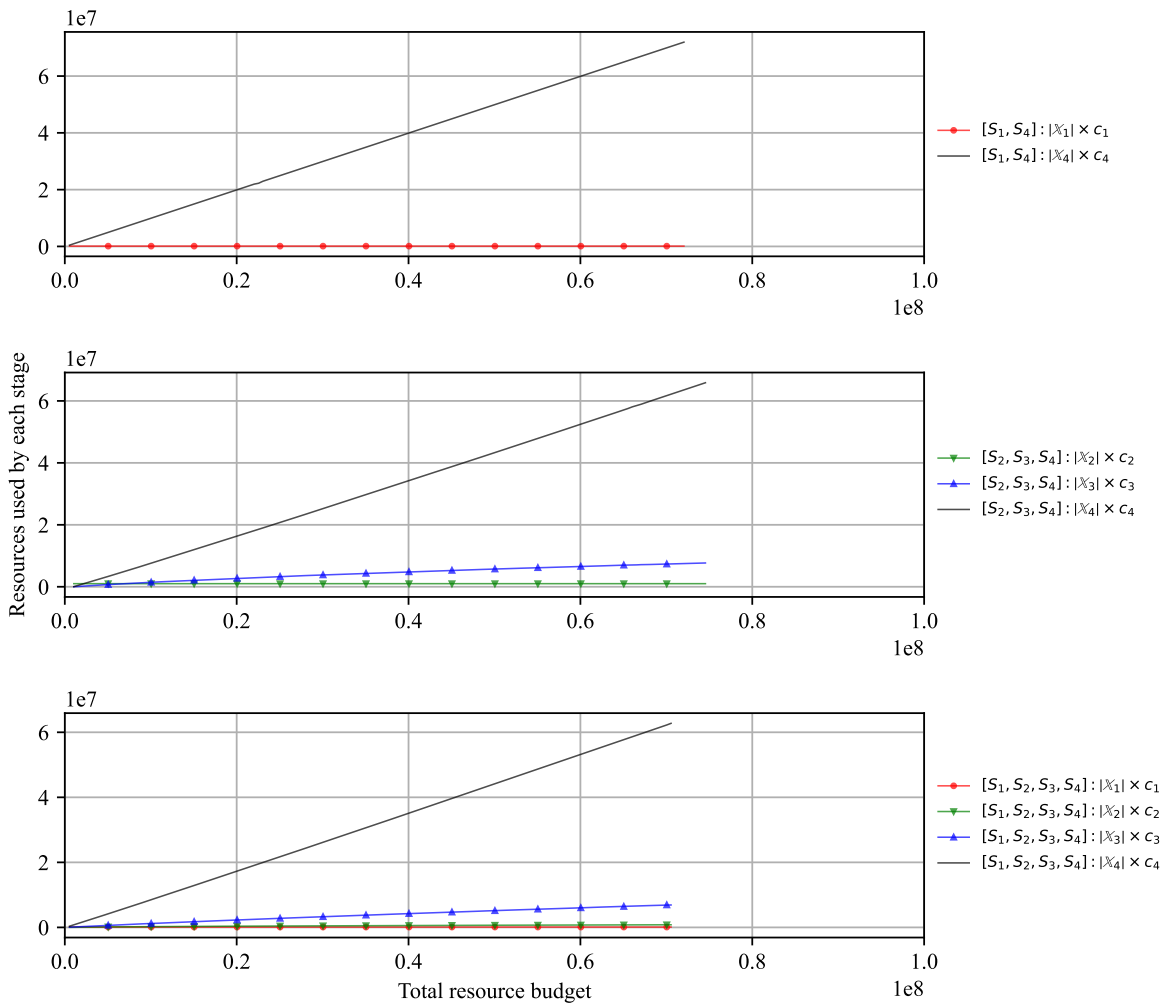

Figure S8: Resources used by each stage.

$$p(y_1, y_2, y_3, y_4) \sim \mathcal{N} \left( \boldsymbol{\mu} = \mathbf{0}, \boldsymbol{\Sigma} = \begin{bmatrix} 1 & 0.8 & 0.8 & 0.8 \\ 0.8 & 1 & 0.8 & 0.8 \\ 0.8 & 0.8 & 1 & 0.8 \\ 0.8 & 0.8 & 0.8 & 1 \end{bmatrix} \right) \quad (3)$$

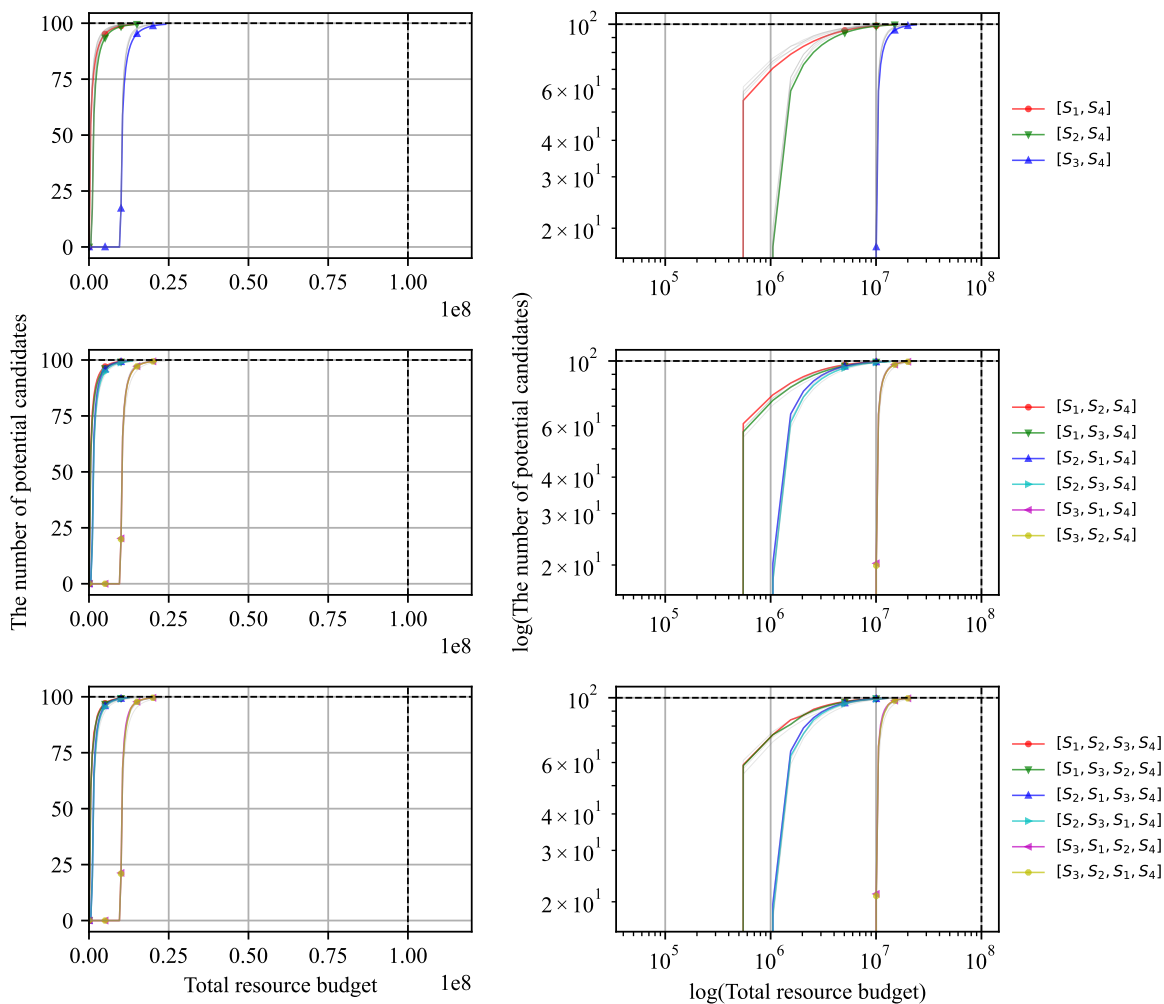

Figure S9: **Performance comparison of the optimized high-throughput virtual screening pipelines in terms of discovery capability.**

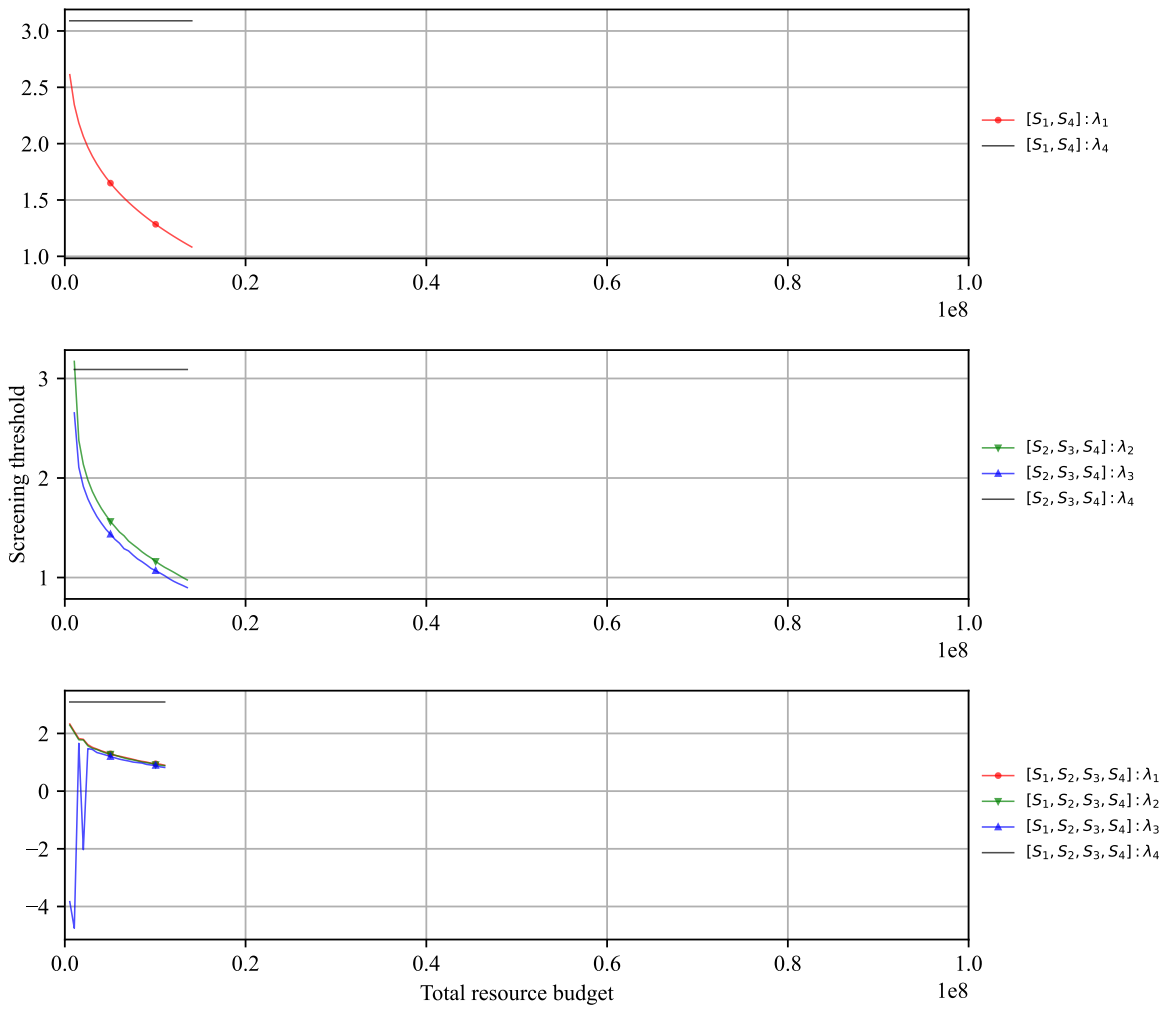

Figure S10: Screening thresholds of the optimized pipelines.

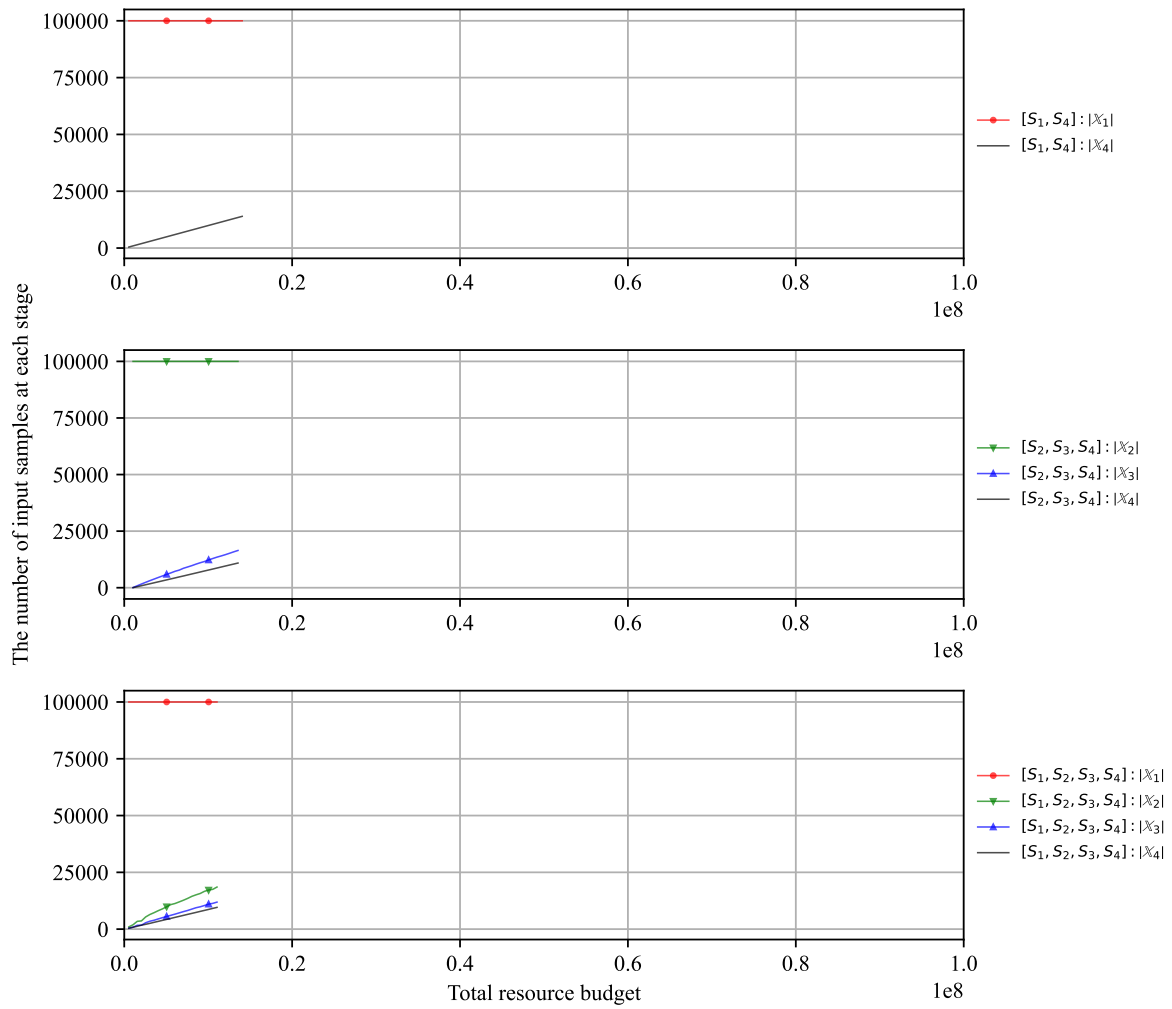

Figure S11: The number of input samples at each stage.

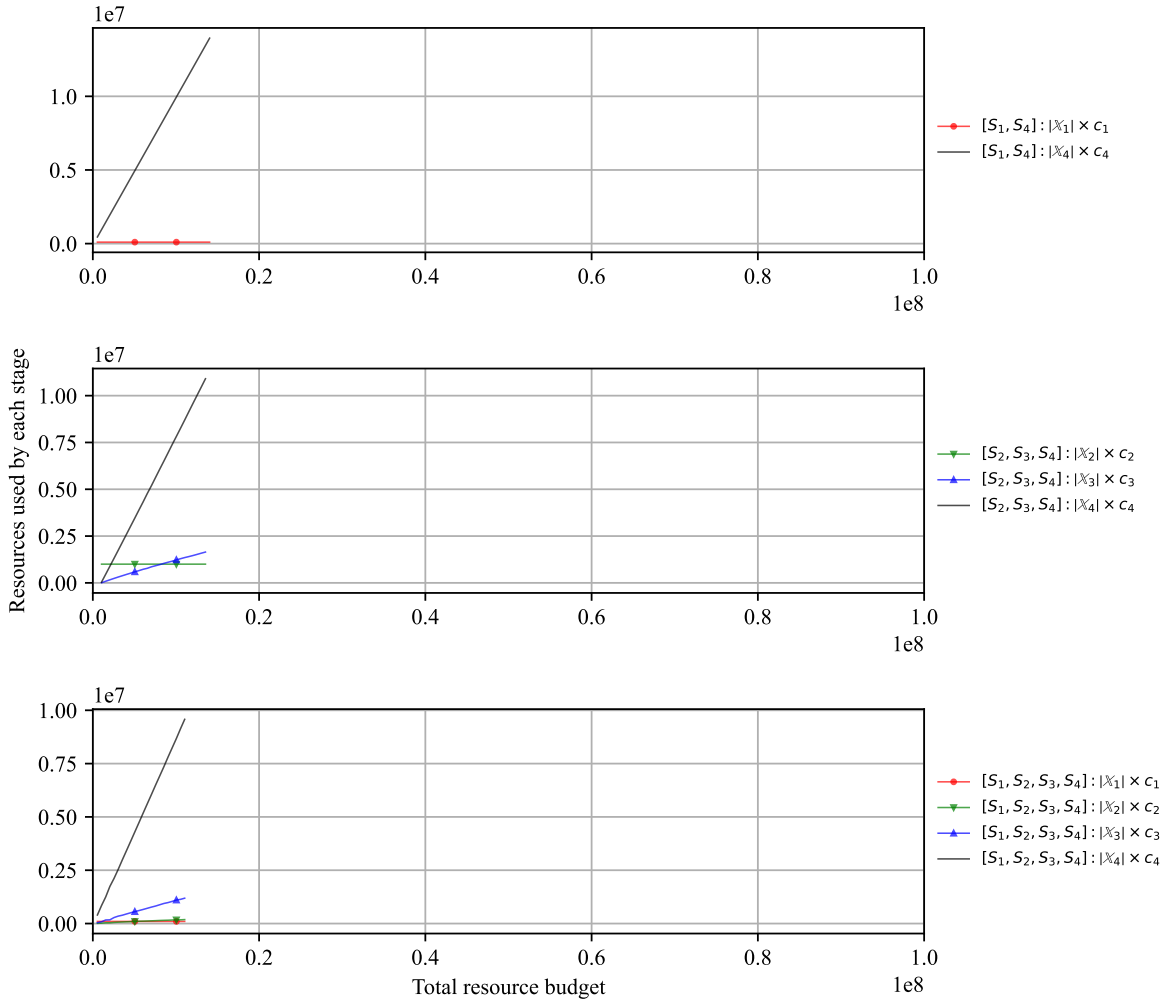

Figure S12: Resources used by each stage.

## Case 2: Non-uniform correlation between the surrogate models

$$p(y_1, y_2, y_3, y_4) \sim \mathcal{N} \left( \boldsymbol{\mu} = \mathbf{0}, \boldsymbol{\Sigma} = \begin{bmatrix} 1 & 0.2 & 0.2 & 0.8 \\ 0.2 & 1 & 0.2 & 0.2 \\ 0.2 & 0.2 & 1 & 0.2 \\ 0.8 & 0.2 & 0.2 & 1 \end{bmatrix} \right) \quad (4)$$

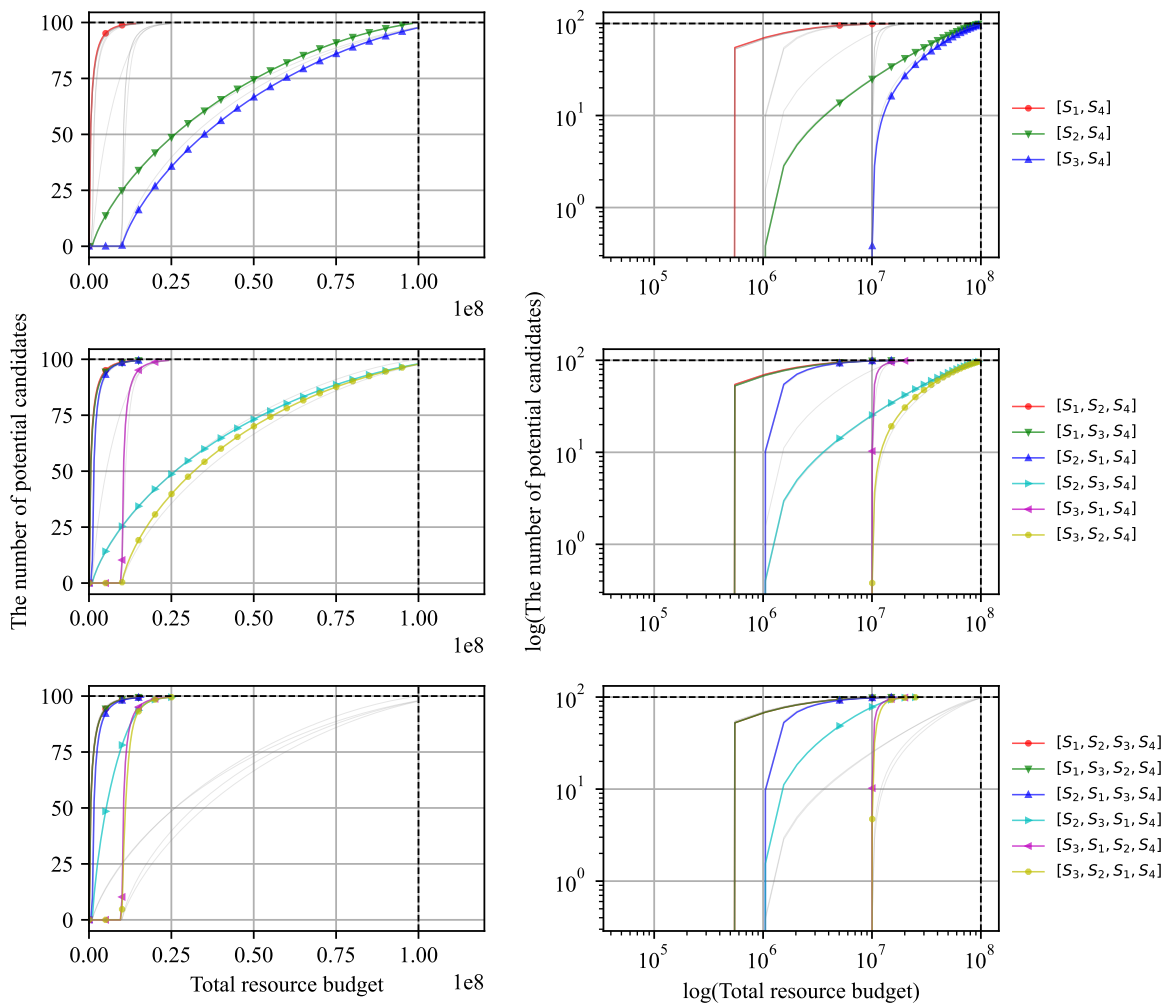

Figure S13: Performance comparison of the optimized high-throughput virtual screening pipelines in terms of discovery capability.

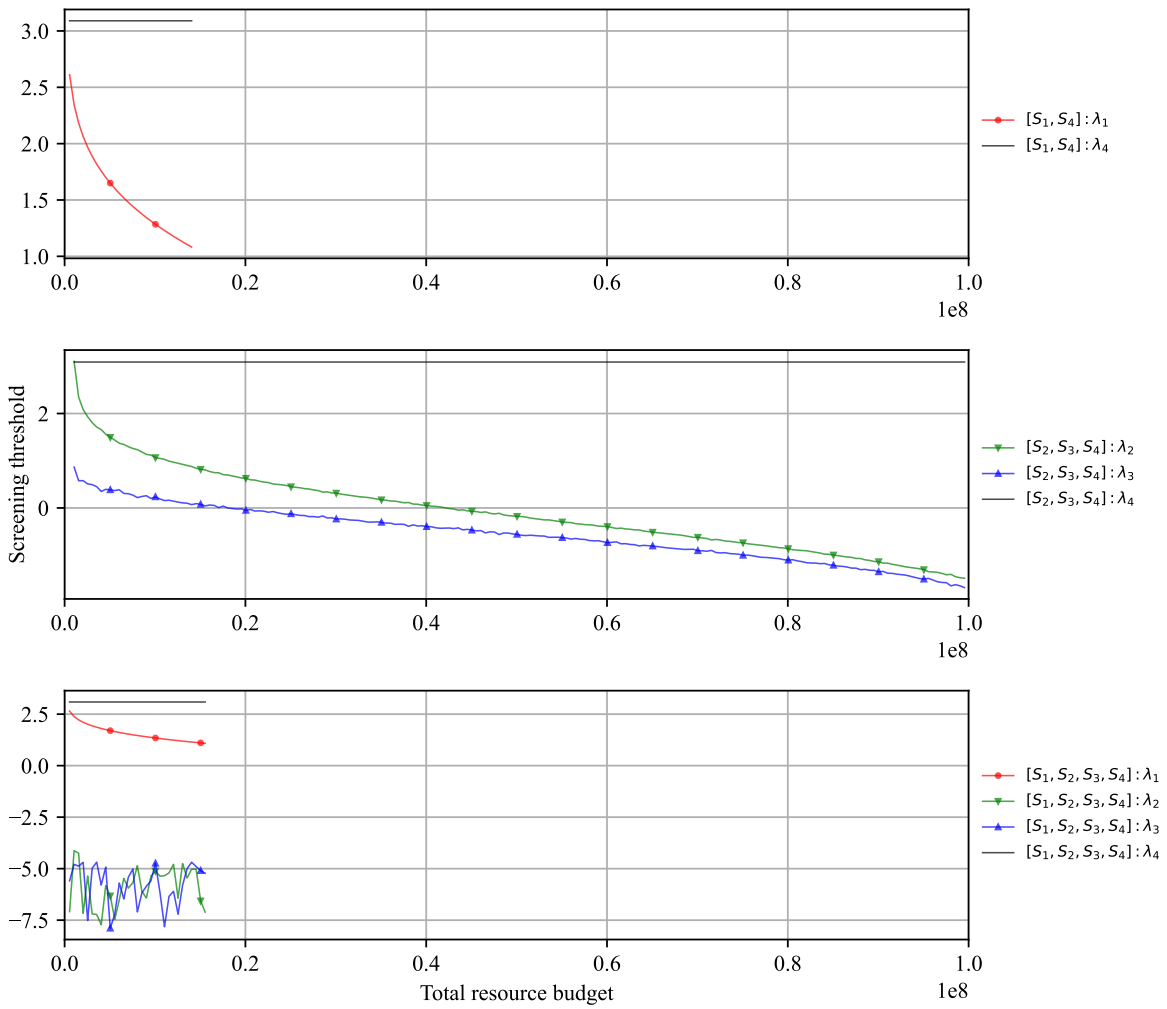

Figure S14: Screening thresholds of the optimized pipelines.

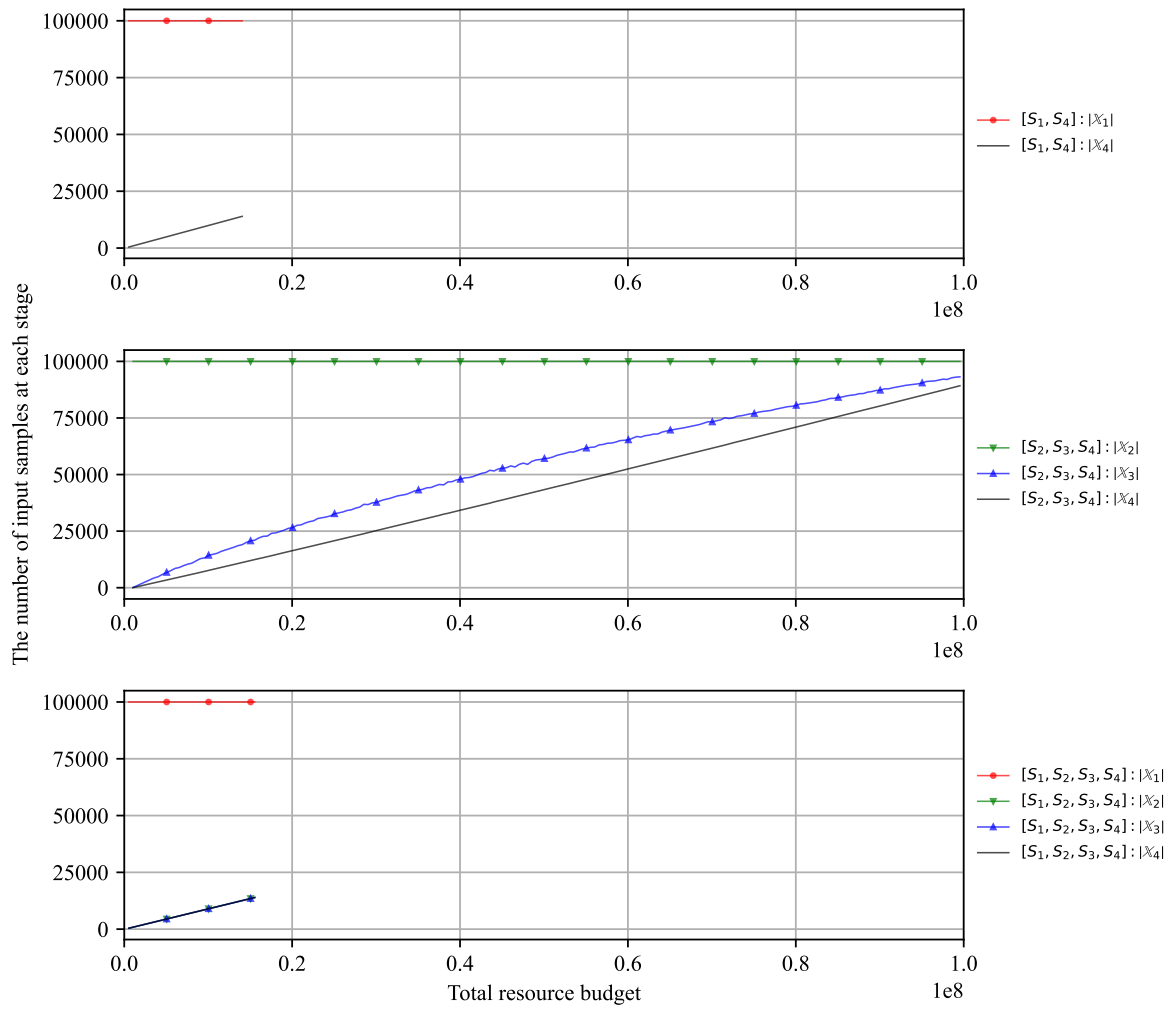

Figure S15: The number of input samples at each stage.



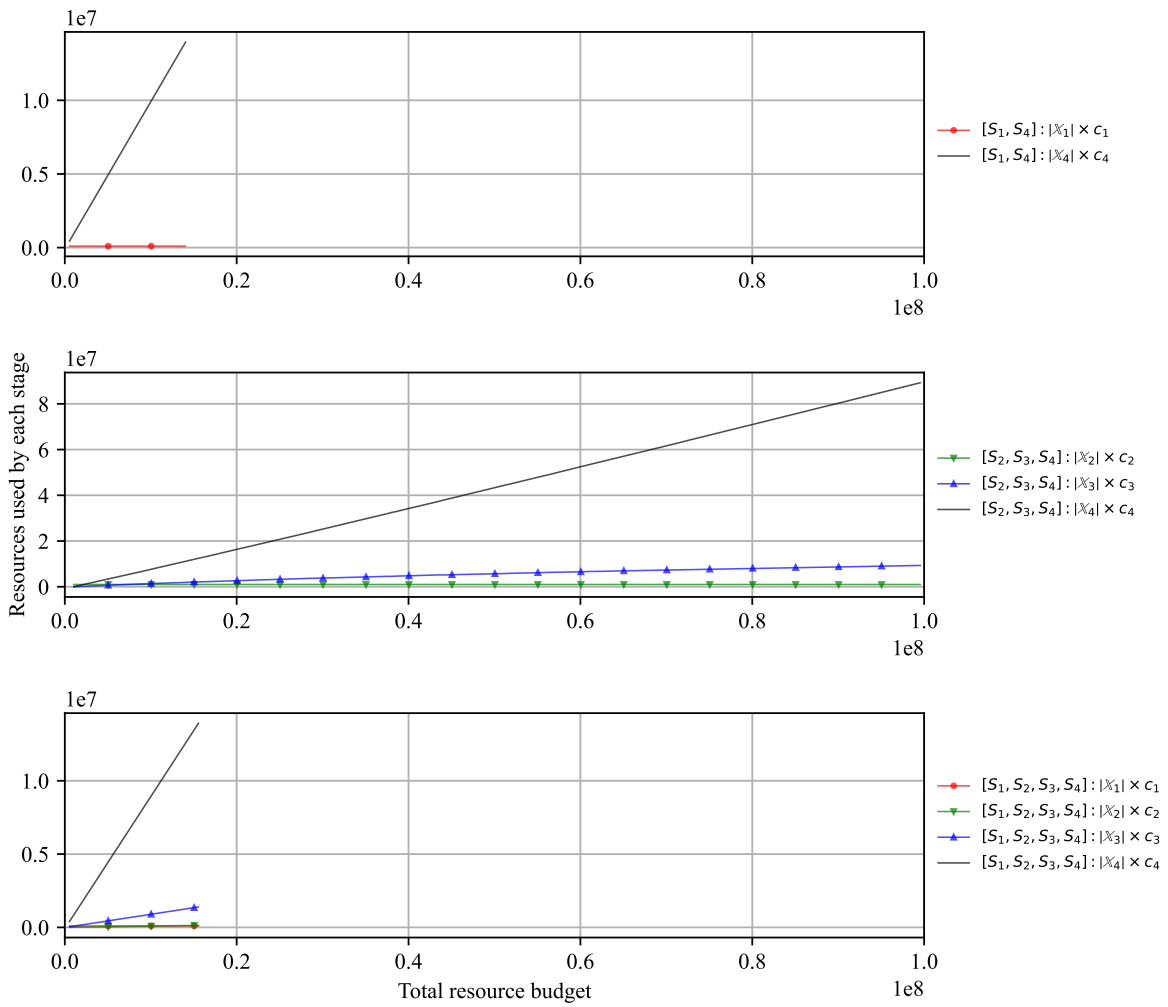

Figure S16: Resources used by each stage.

$$p(y_1, y_2, y_3, y_4) \sim \mathcal{N} \left( \boldsymbol{\mu} = \mathbf{0}, \boldsymbol{\Sigma} = \begin{bmatrix} 1 & 0.2 & 0.2 & 0.2 \\ 0.2 & 1 & 0.2 & 0.8 \\ 0.2 & 0.2 & 1 & 0.2 \\ 0.2 & 0.8 & 0.2 & 1 \end{bmatrix} \right) \quad (5)$$

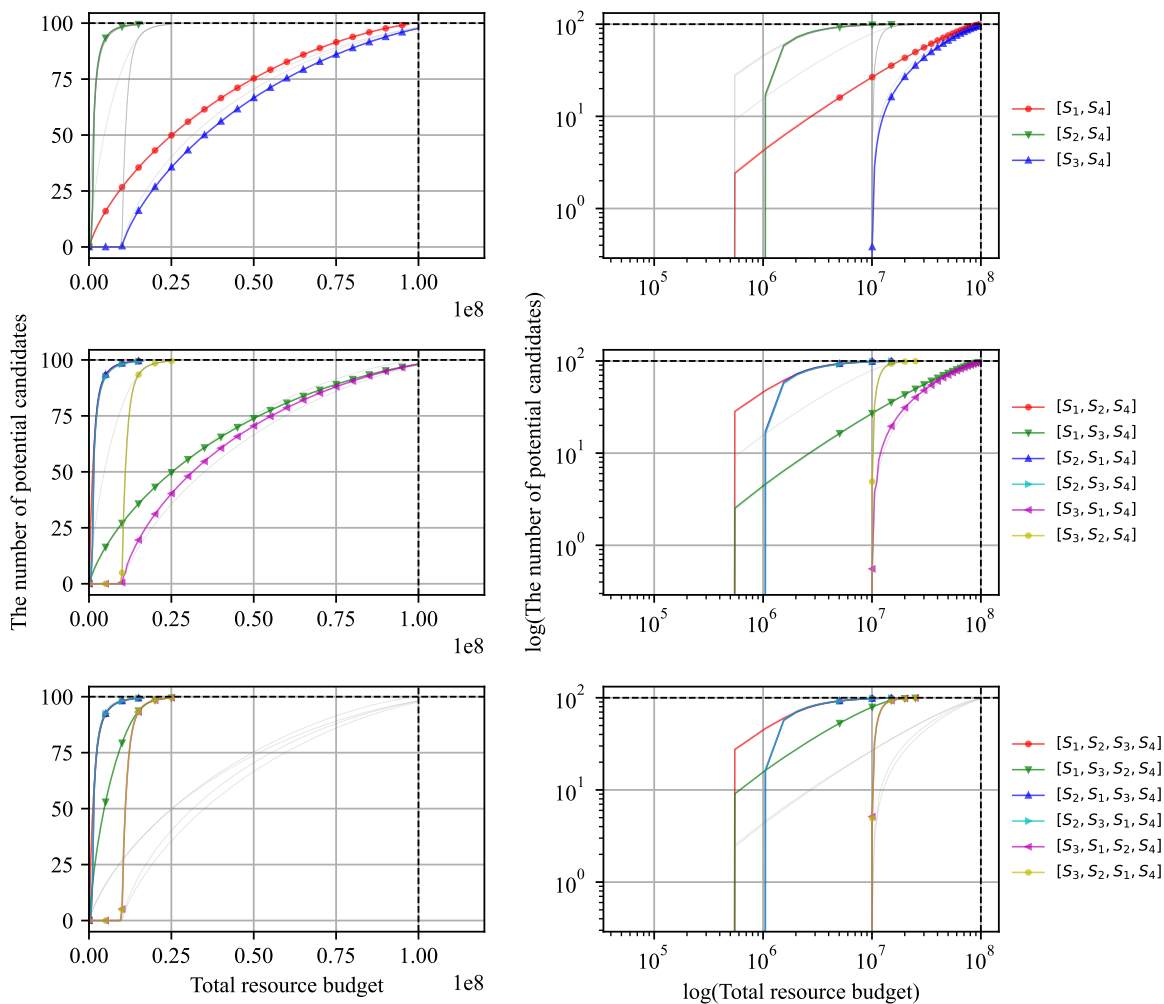

Figure S17: Performance comparison of the optimized high-throughput virtual screening pipelines in terms of discovery capability.

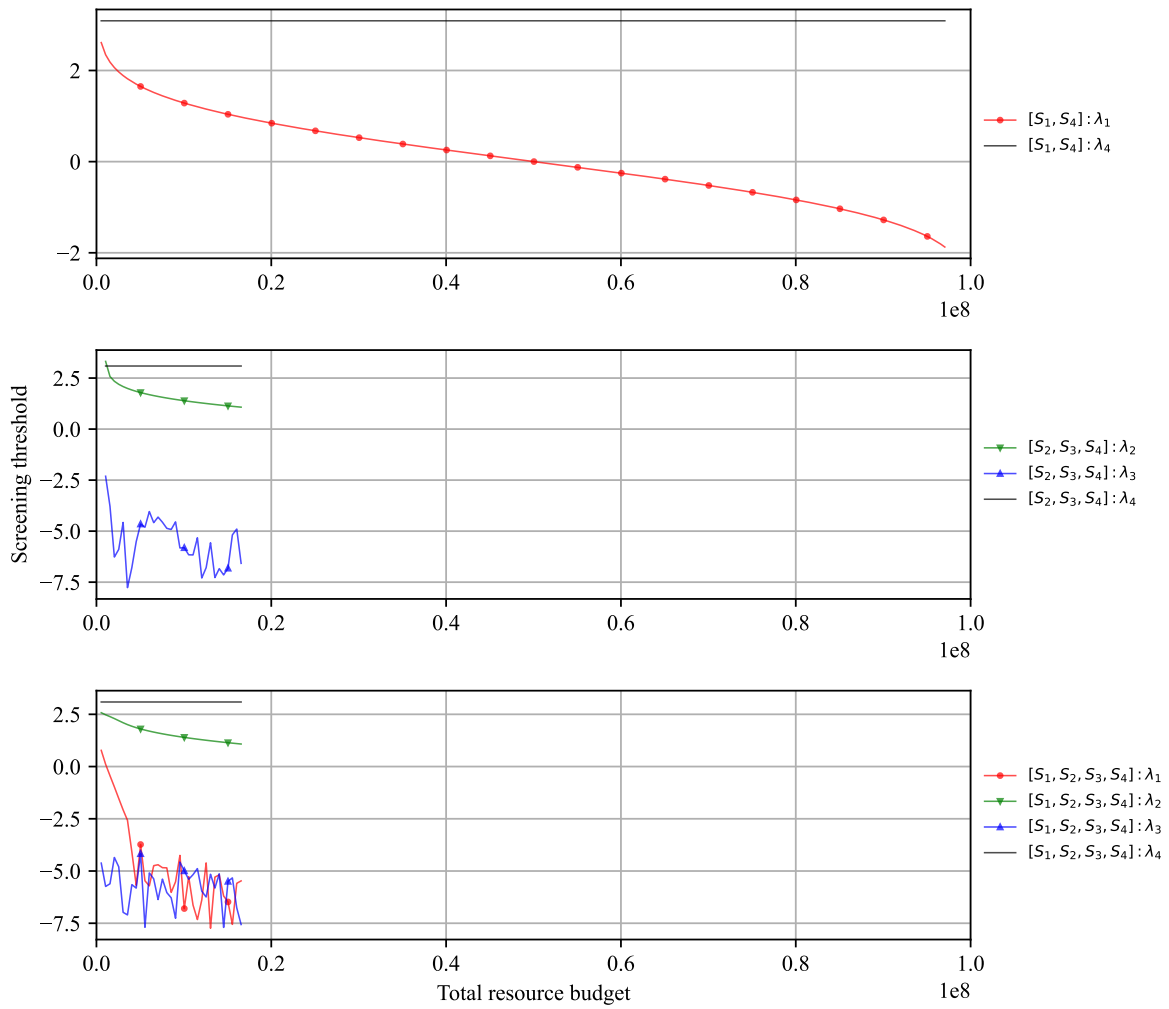

Figure S18: Screening thresholds of the optimized pipelines.

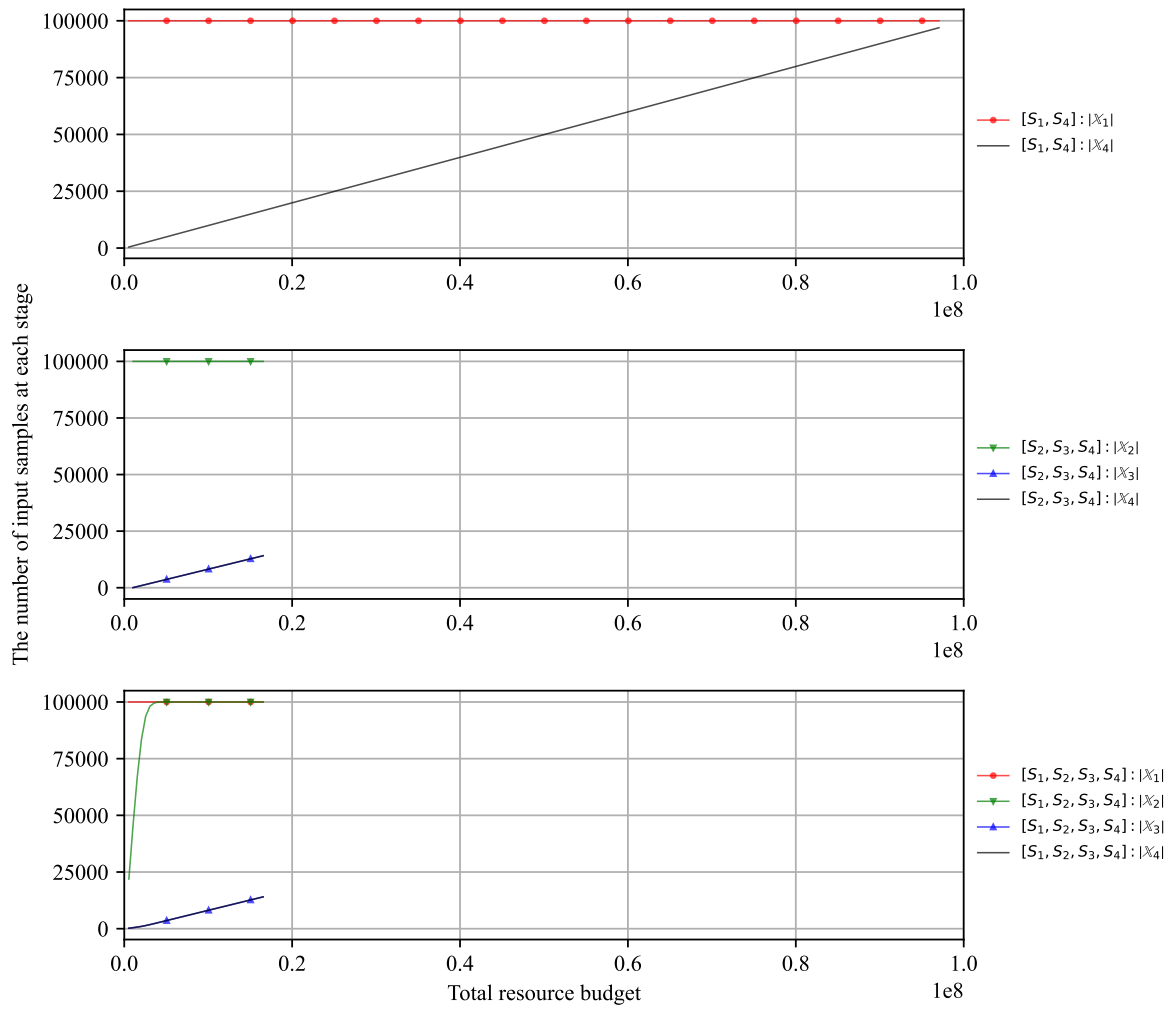

Figure S19: The number of input samples at each stage.

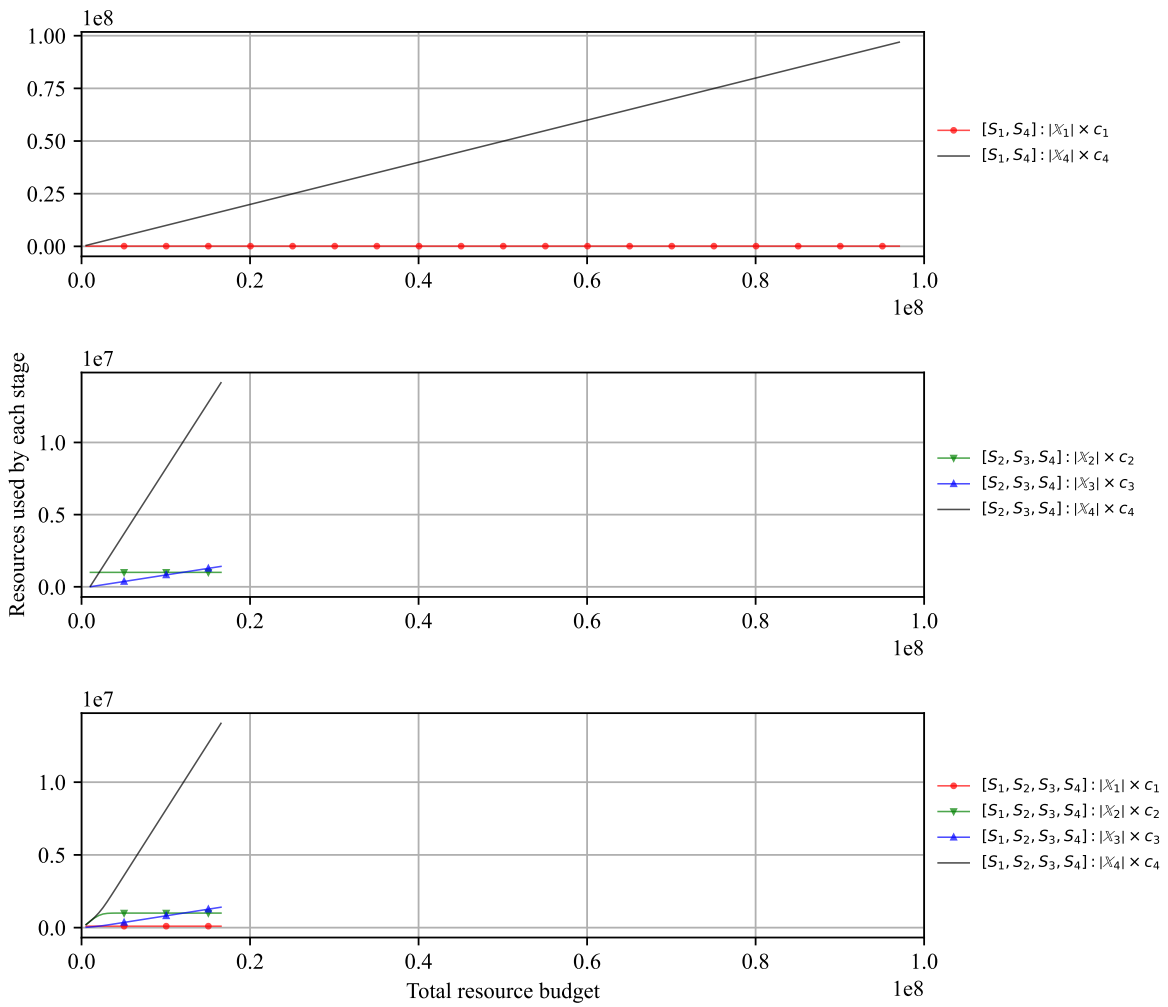

Figure S20: Resources used by each stage.

$$p(y_1, y_2, y_3, y_4) \sim \mathcal{N} \left( \boldsymbol{\mu} = \mathbf{0}, \boldsymbol{\Sigma} = \begin{bmatrix} 1 & 0.2 & 0.2 & 0.2 \\ 0.2 & 1 & 0.2 & 0.2 \\ 0.2 & 0.2 & 1 & 0.8 \\ 0.2 & 0.2 & 0.8 & 1 \end{bmatrix} \right) \quad (6)$$

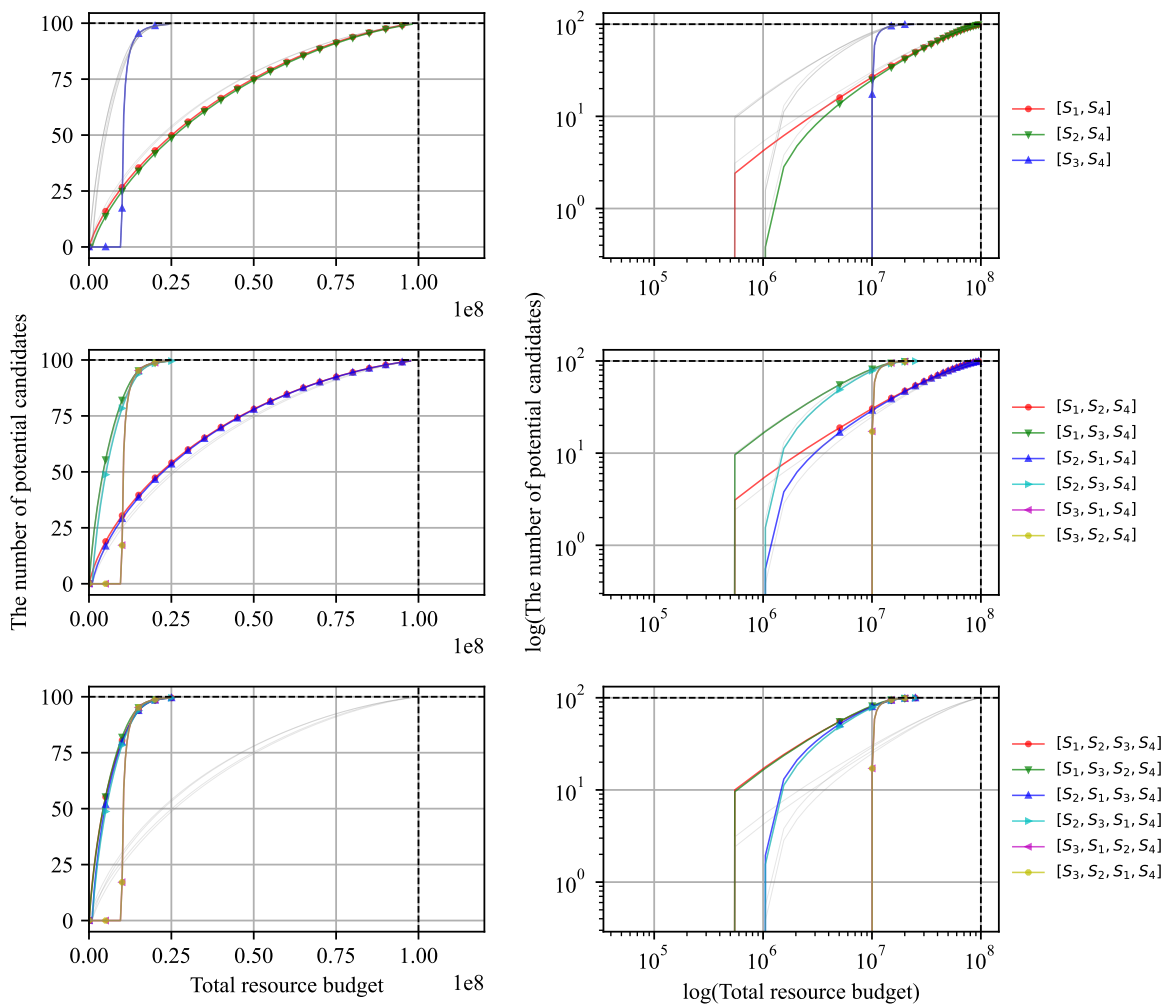

Figure S21: Performance comparison of the optimized high-throughput virtual screening pipelines in terms of discovery capability.

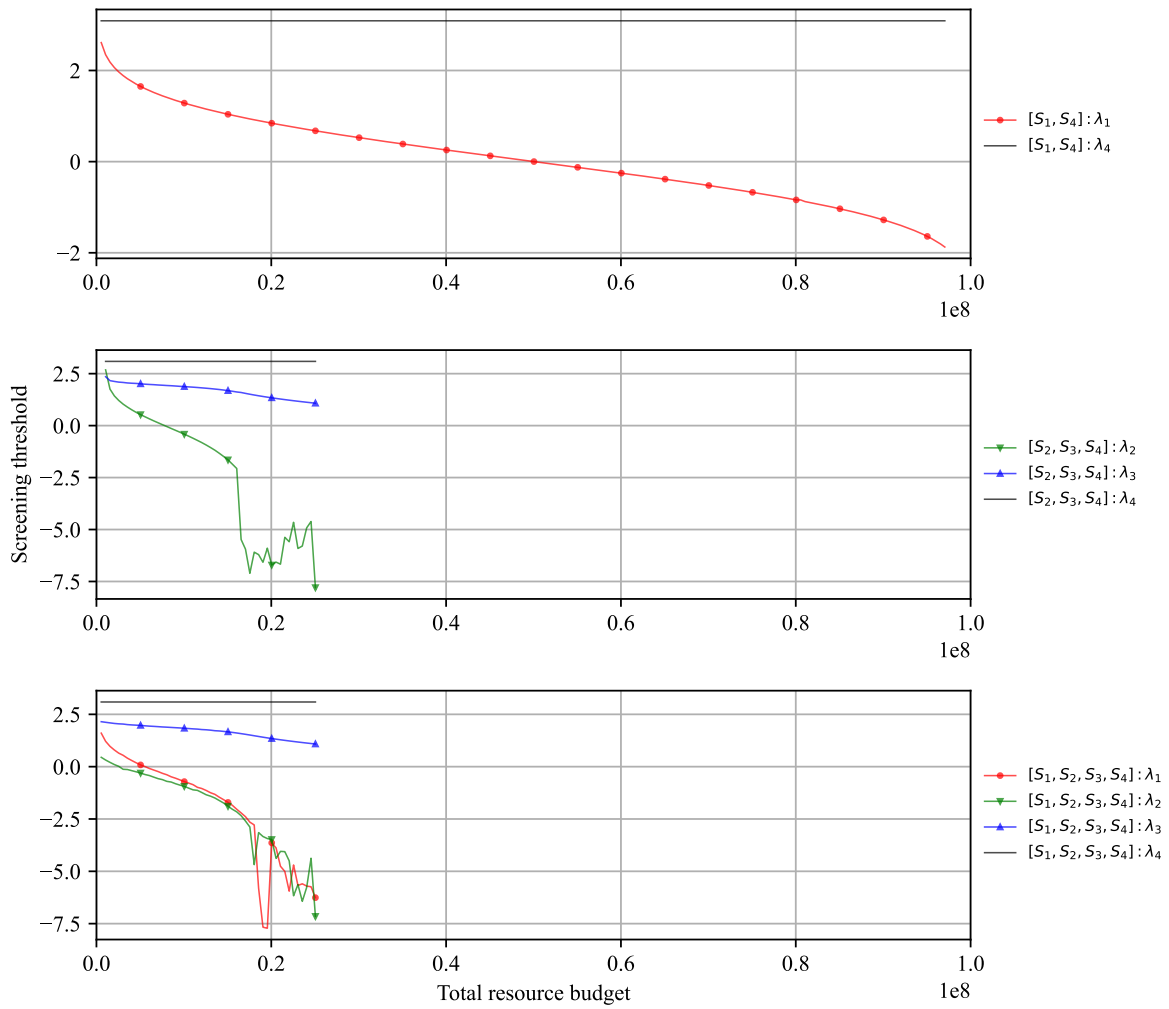

Figure S22: Screening thresholds of the optimized pipelines.

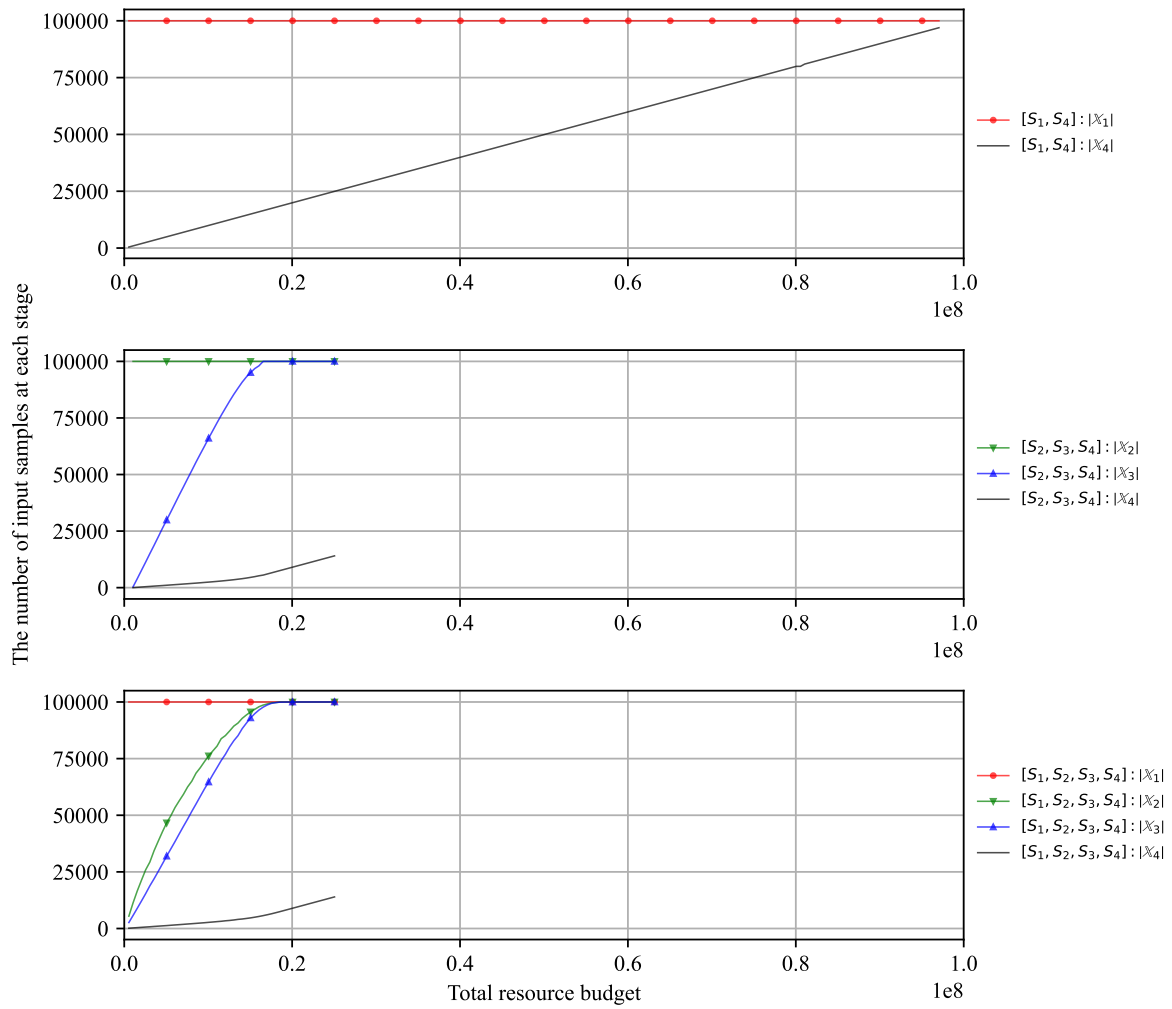

Figure S23: The number of input samples at each stage.



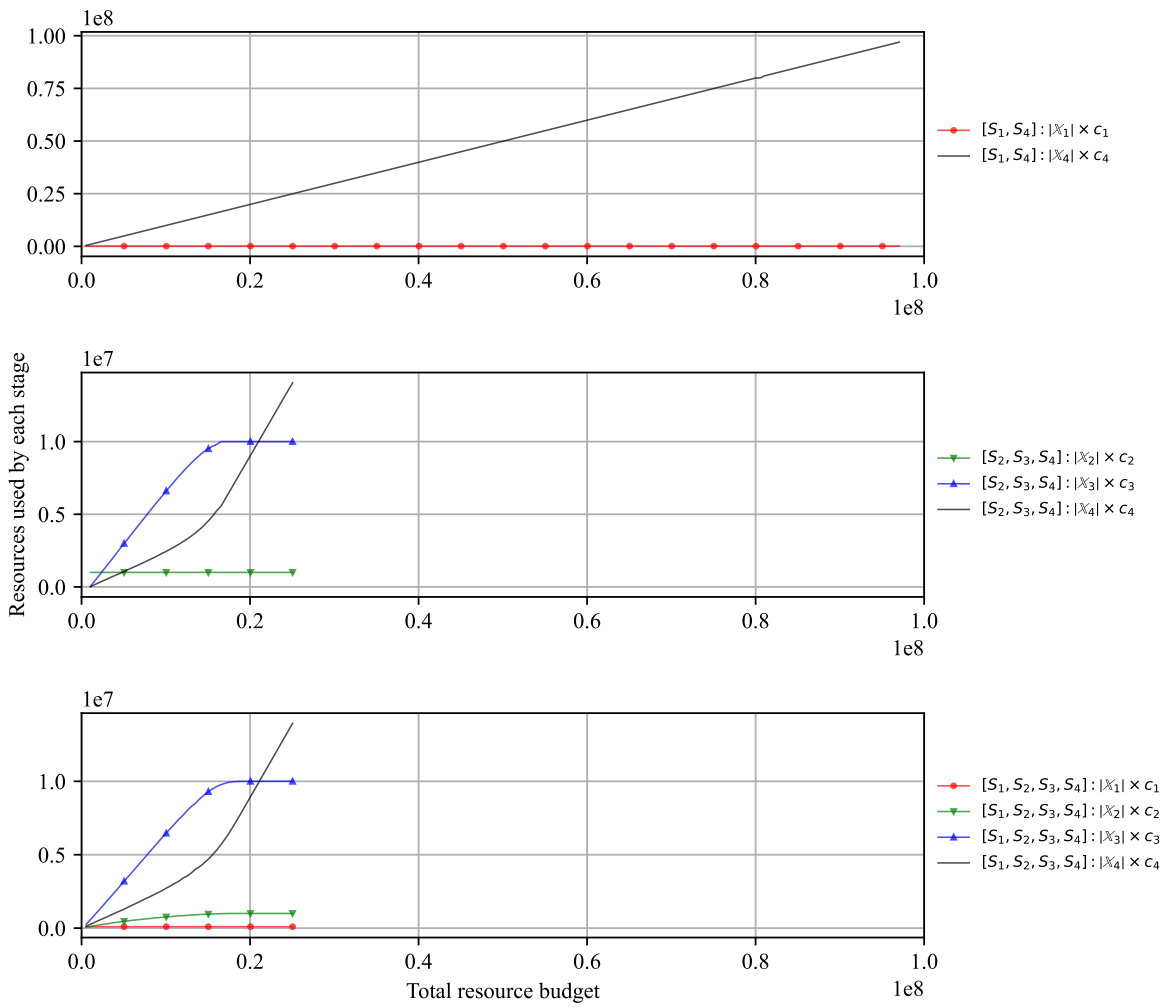

Figure S24: Resources used by each stage.

$$p(y_1, y_2, y_3, y_4) \sim \mathcal{N} \left( \boldsymbol{\mu} = \mathbf{0}, \boldsymbol{\Sigma} = \begin{bmatrix} 1 & 0.2 & 0.2 & 0.2 \\ 0.2 & 1 & 0.8 & 0.8 \\ 0.2 & 0.8 & 1 & 0.8 \\ 0.2 & 0.8 & 0.8 & 1 \end{bmatrix} \right) \quad (7)$$

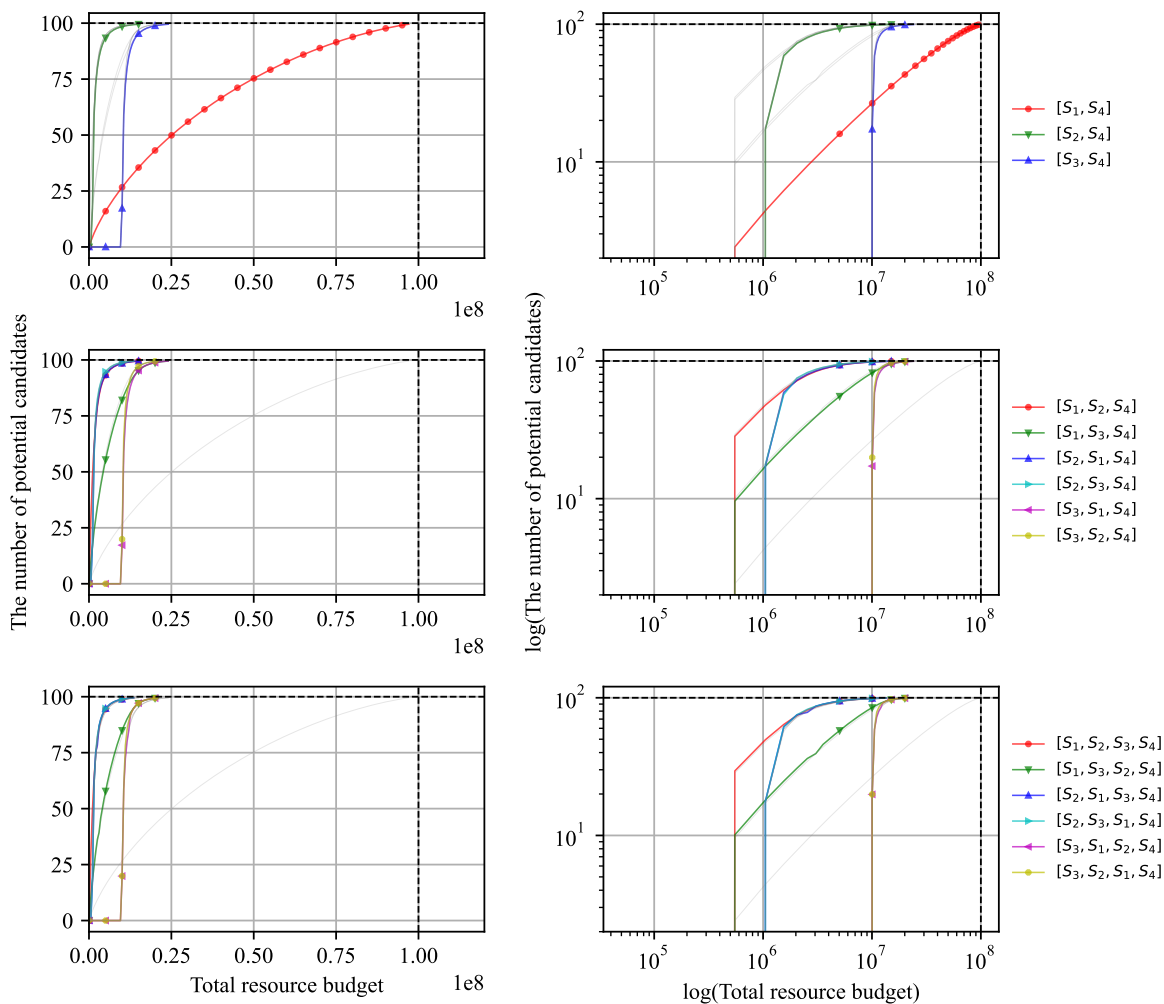

Figure S25: Performance comparison of the optimized high-throughput virtual screening pipelines in terms of discovery capability.

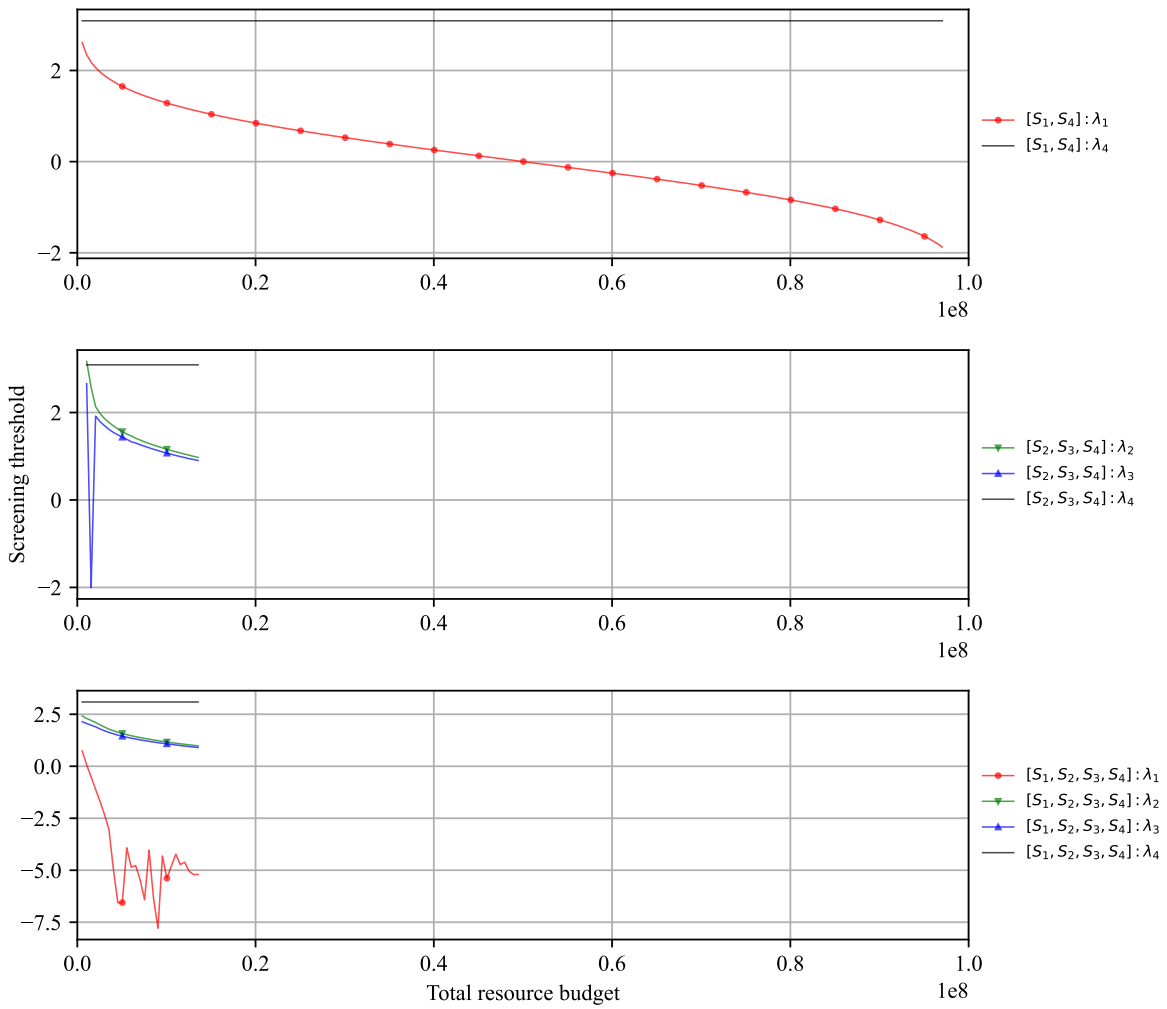

Figure S26: Screening thresholds of the optimized pipelines.

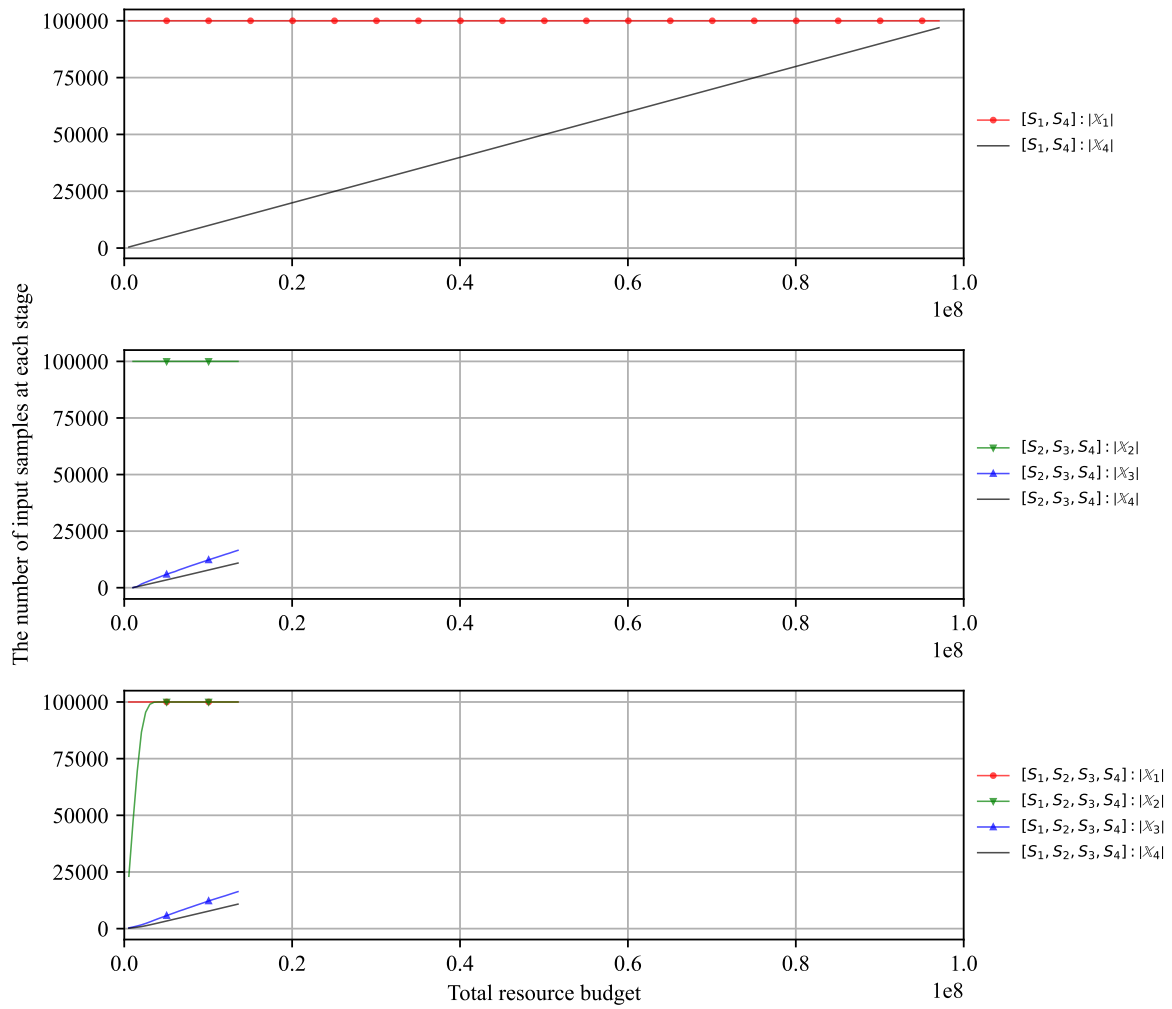

Figure S27: The number of input samples at each stage.

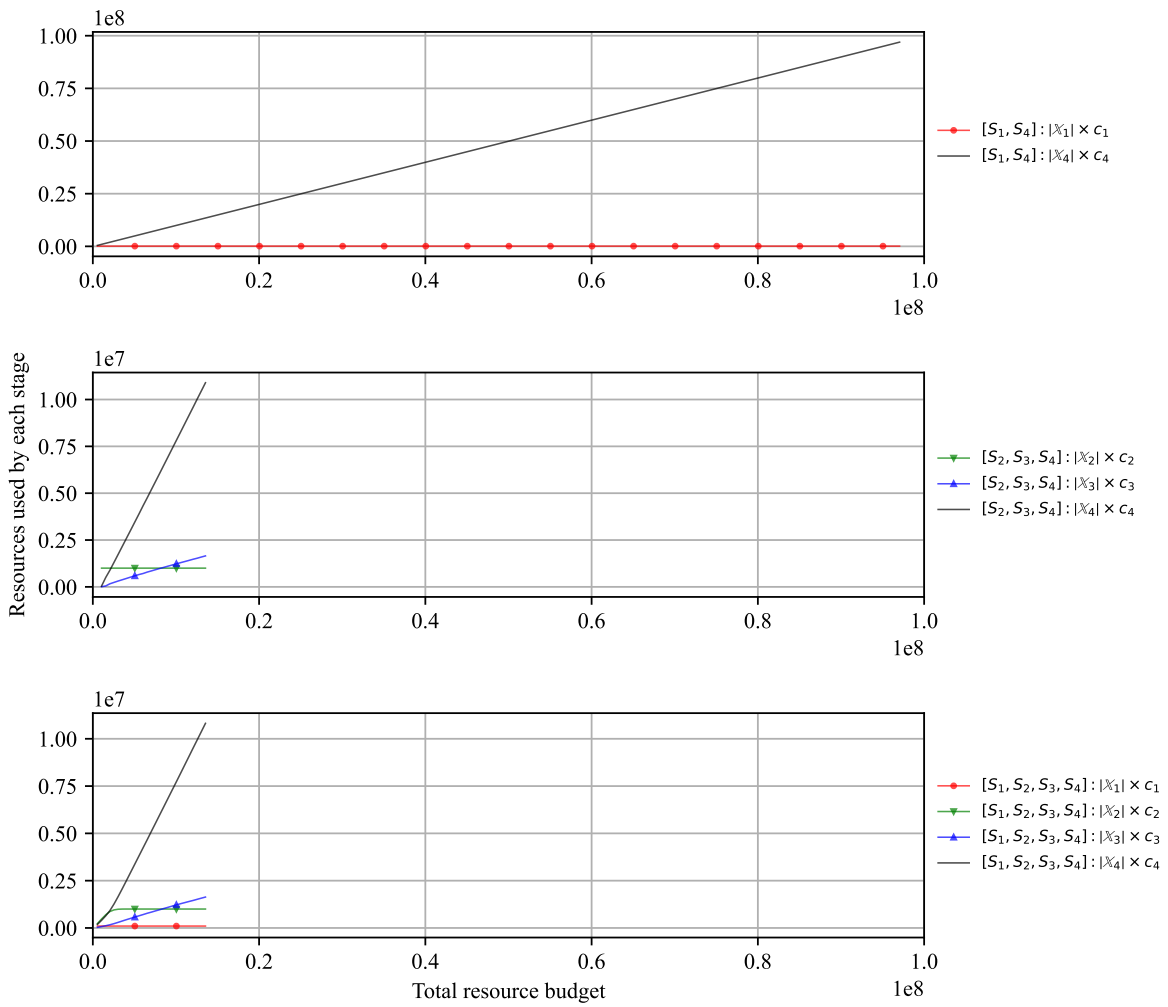

Figure S28: Resources used by each stage.

$$p(y_1, y_2, y_3, y_4) \sim \mathcal{N} \left( \boldsymbol{\mu} = \mathbf{0}, \boldsymbol{\Sigma} = \begin{bmatrix} 1 & 0.2 & 0.8 & 0.8 \\ 0.2 & 1 & 0.2 & 0.2 \\ 0.8 & 0.2 & 1 & 0.8 \\ 0.8 & 0.2 & 0.8 & 1 \end{bmatrix} \right) \quad (8)$$

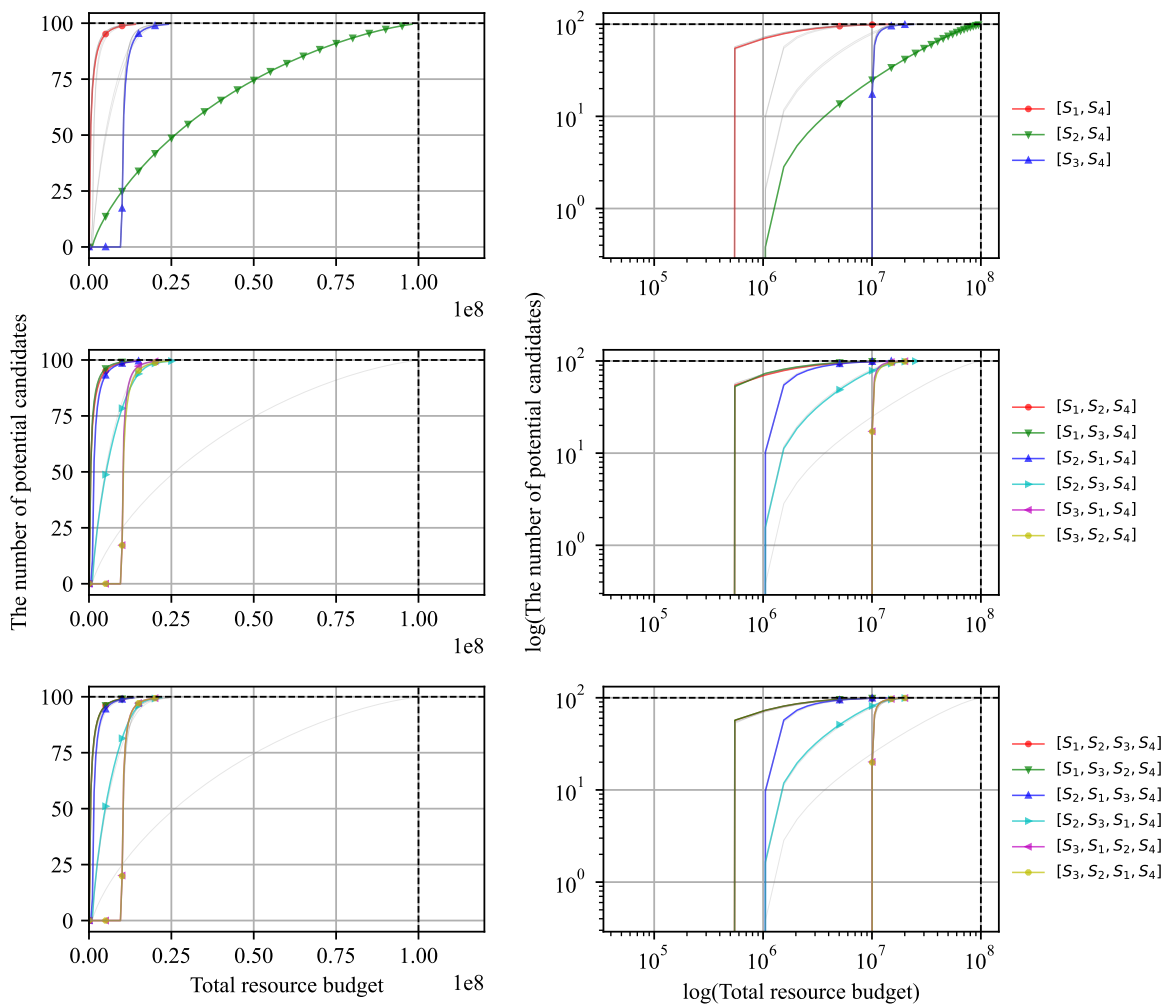

Figure S29: Performance comparison of the optimized high-throughput virtual screening pipelines in terms of discovery capability.

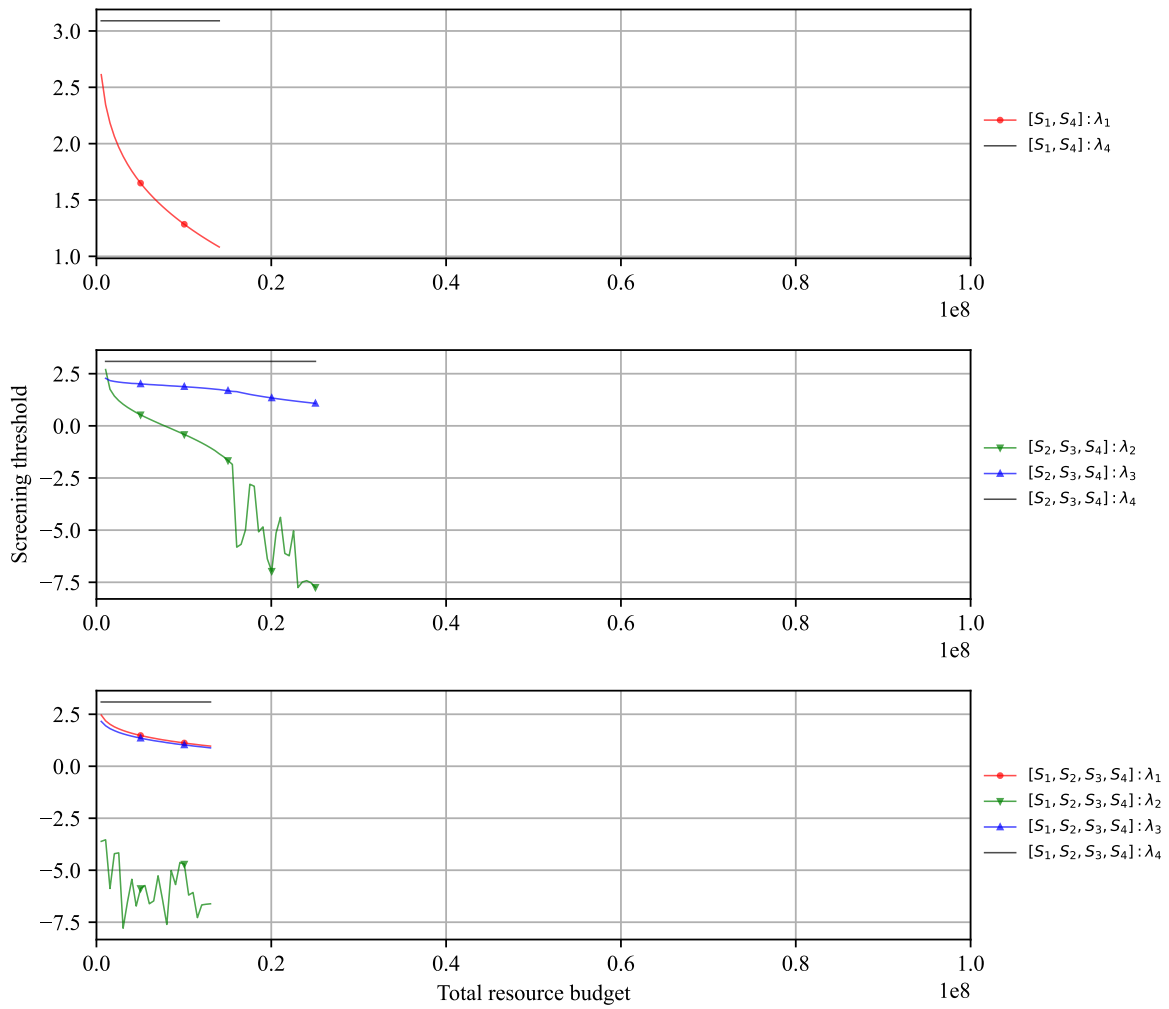

Figure S30: Screening thresholds of the optimized pipelines.

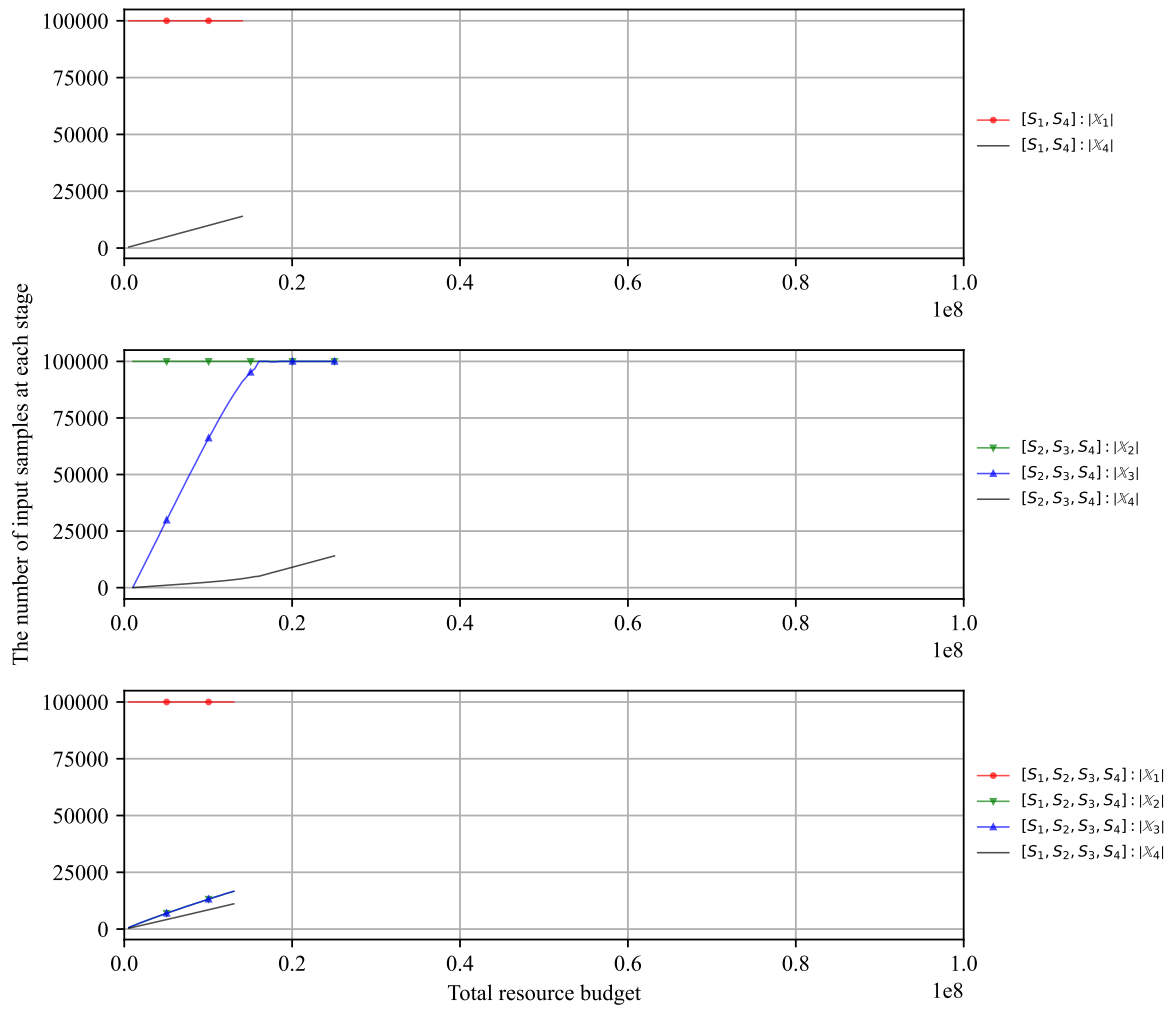

Figure S31: The number of input samples at each stage.



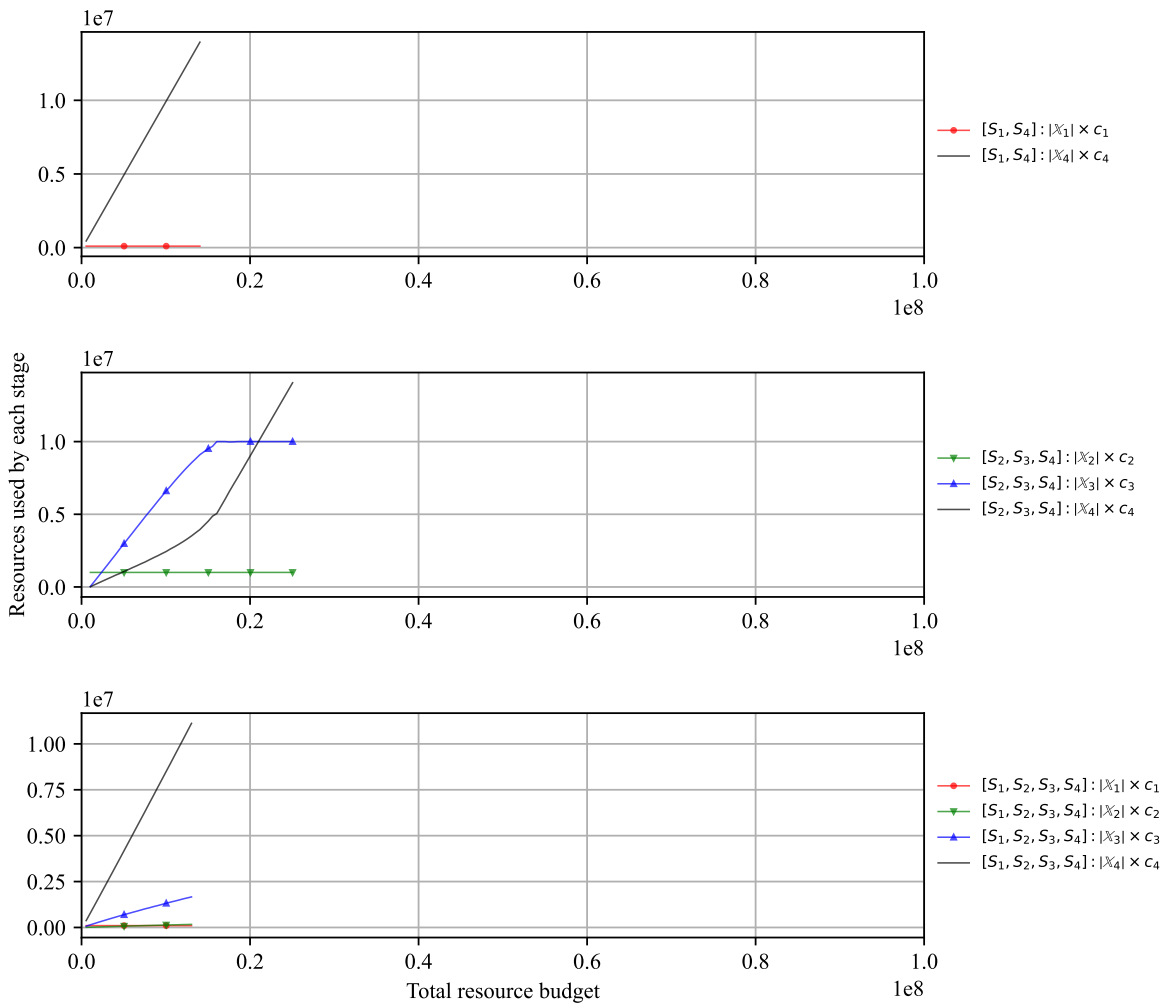

Figure S32: Resources used by each stage.

$$p(y_1, y_2, y_3, y_4) \sim \mathcal{N} \left( \boldsymbol{\mu} = \mathbf{0}, \boldsymbol{\Sigma} = \begin{bmatrix} 1 & 0.8 & 0.2 & 0.8 \\ 0.8 & 1 & 0.2 & 0.8 \\ 0.2 & 0.2 & 1 & 0.2 \\ 0.8 & 0.8 & 0.2 & 1 \end{bmatrix} \right) \quad (9)$$

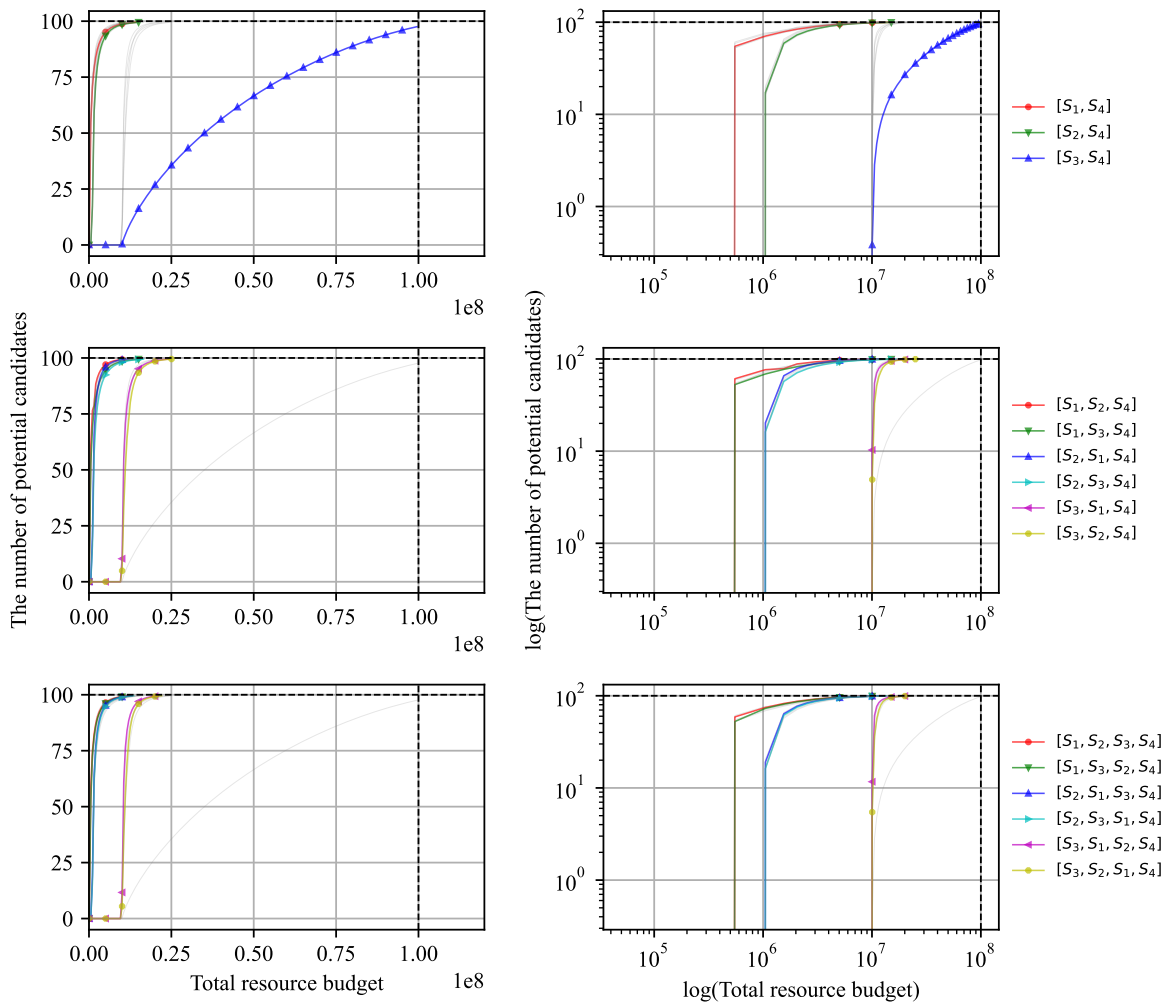

Figure S33: Performance comparison of the optimized high-throughput virtual screening pipelines in terms of discovery capability.

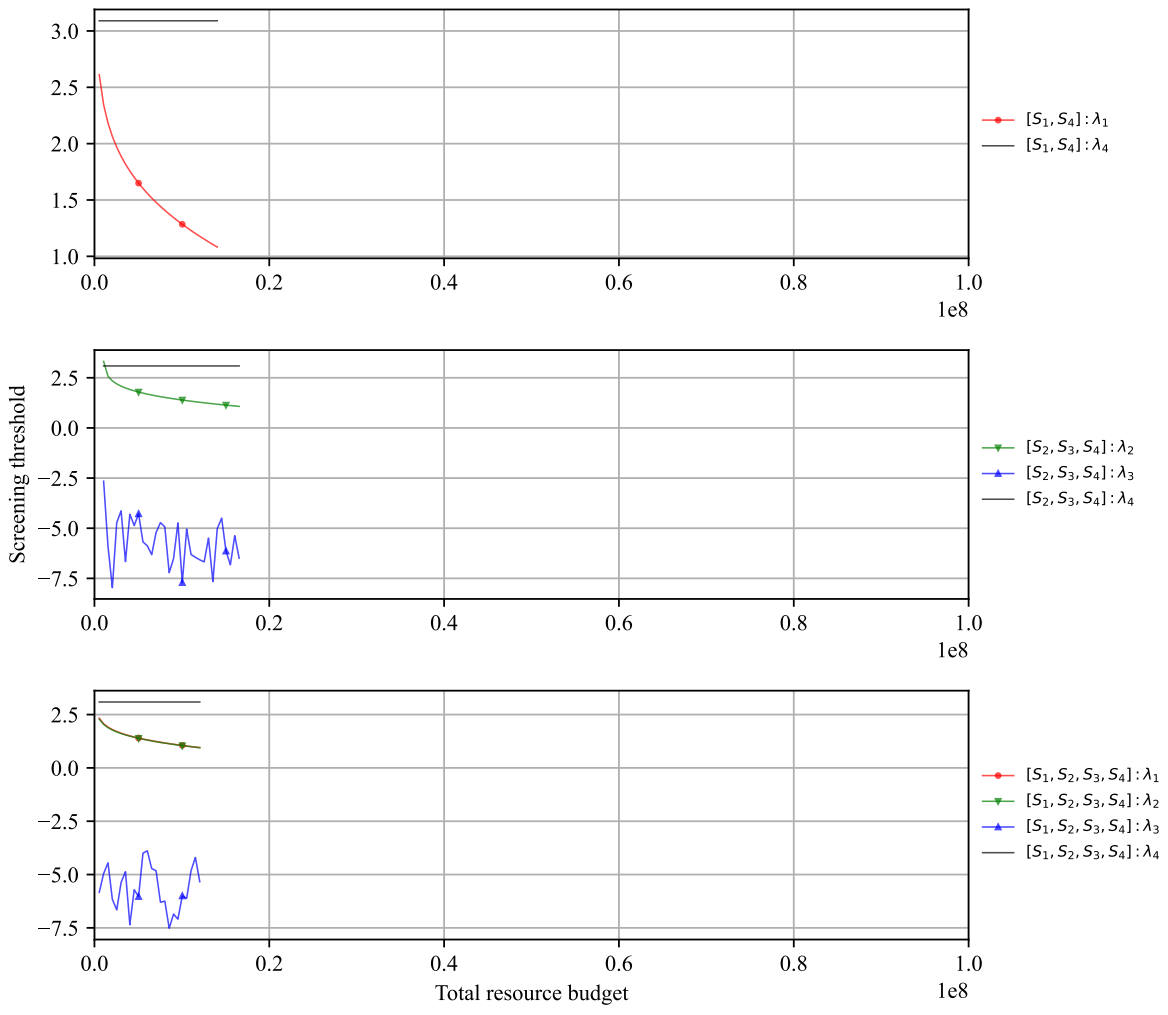

Figure S34: Screening thresholds of the optimized pipelines.

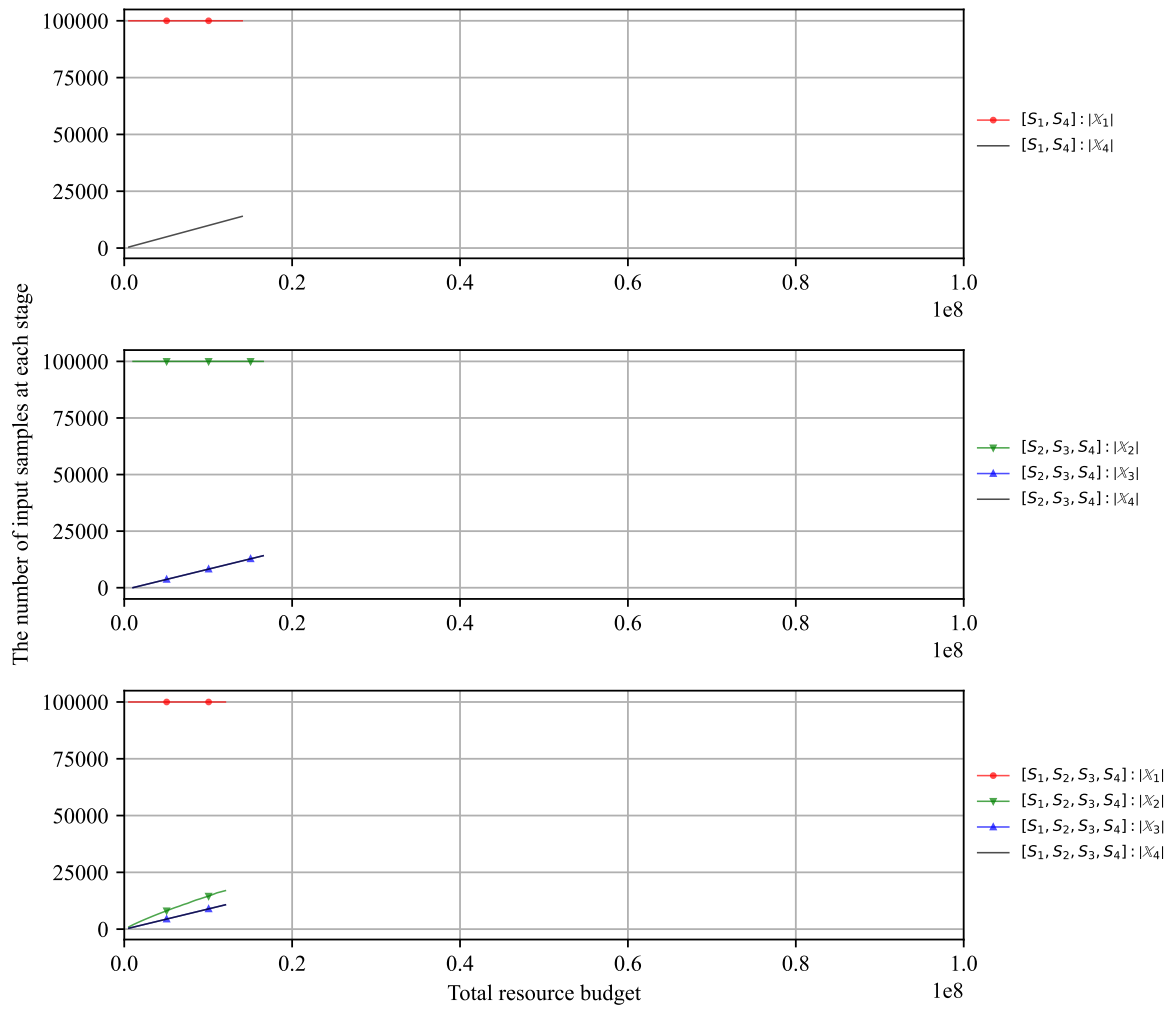

Figure S35: The number of input samples at each stage.

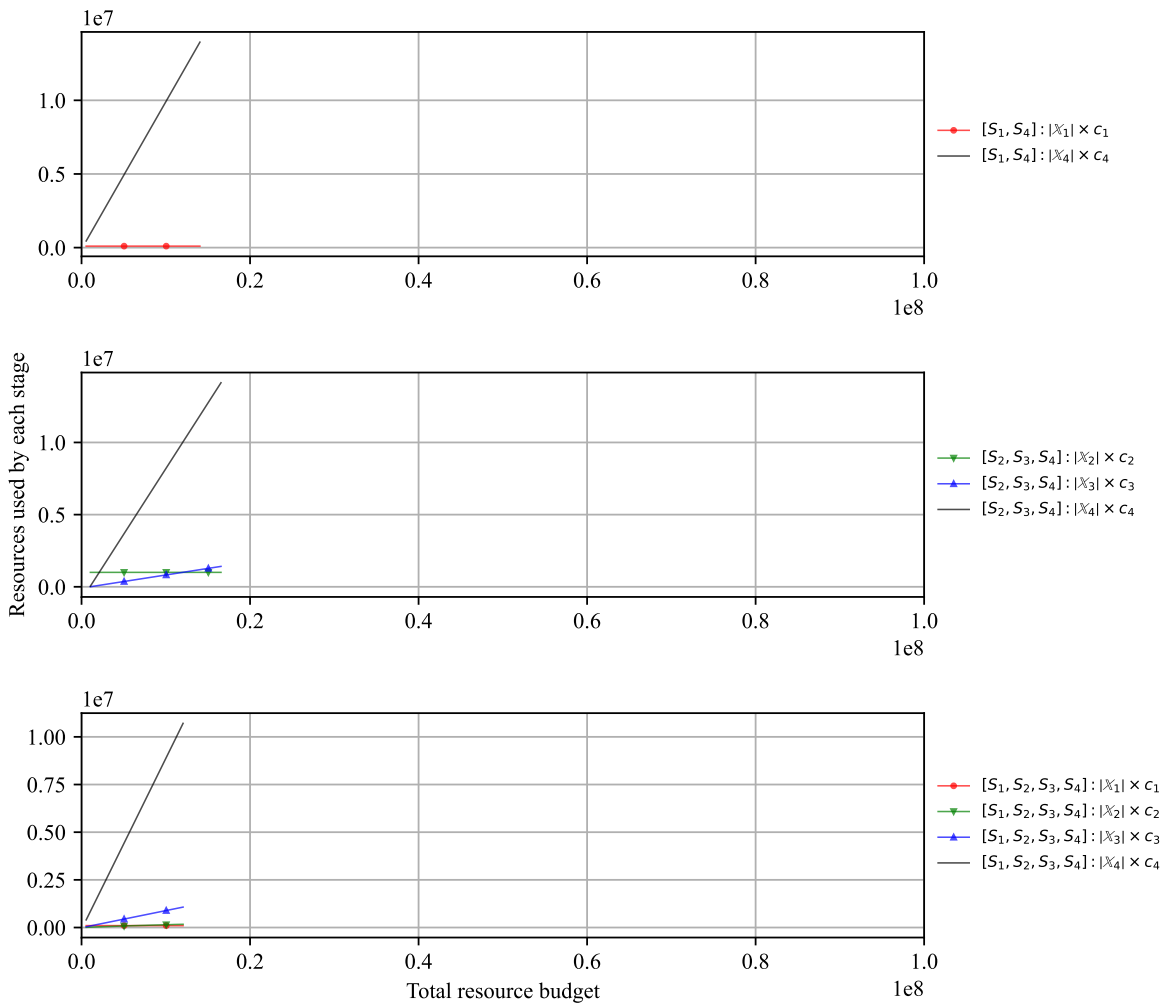

Figure S36: Resources used by each stage.

$$p(y_1, y_2, y_3, y_4) \sim \mathcal{N} \left( \boldsymbol{\mu} = \mathbf{0}, \boldsymbol{\Sigma} = \begin{bmatrix} 1 & 0.3 & 0.2 & 0.1 \\ 0.3 & 1 & 0.3 & 0.2 \\ 0.2 & 0.3 & 1 & 0.3 \\ 0.1 & 0.2 & 0.3 & 1 \end{bmatrix} \right) \quad (10)$$

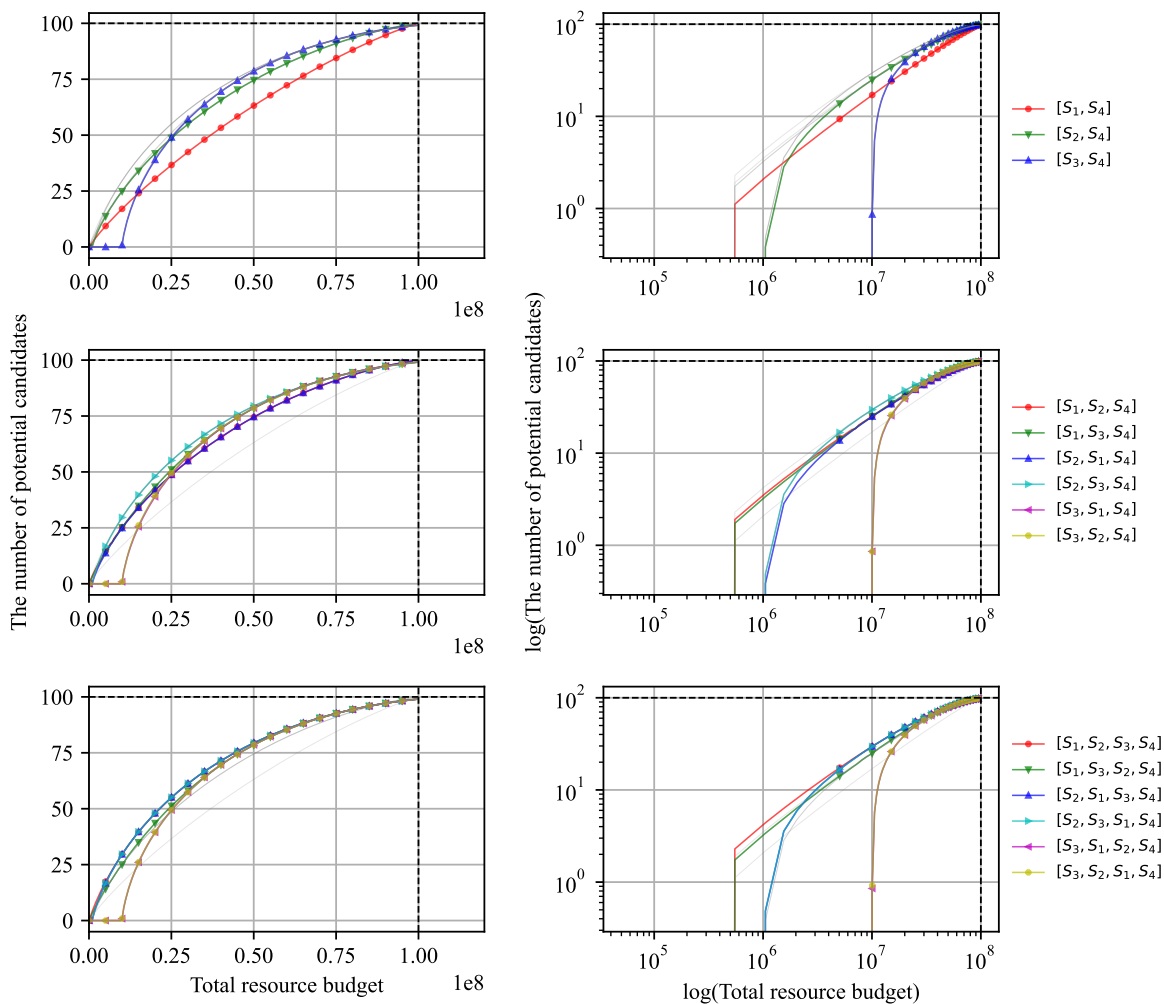

Figure S37: Performance comparison of the optimized high-throughput virtual screening pipelines in terms of discovery capability.

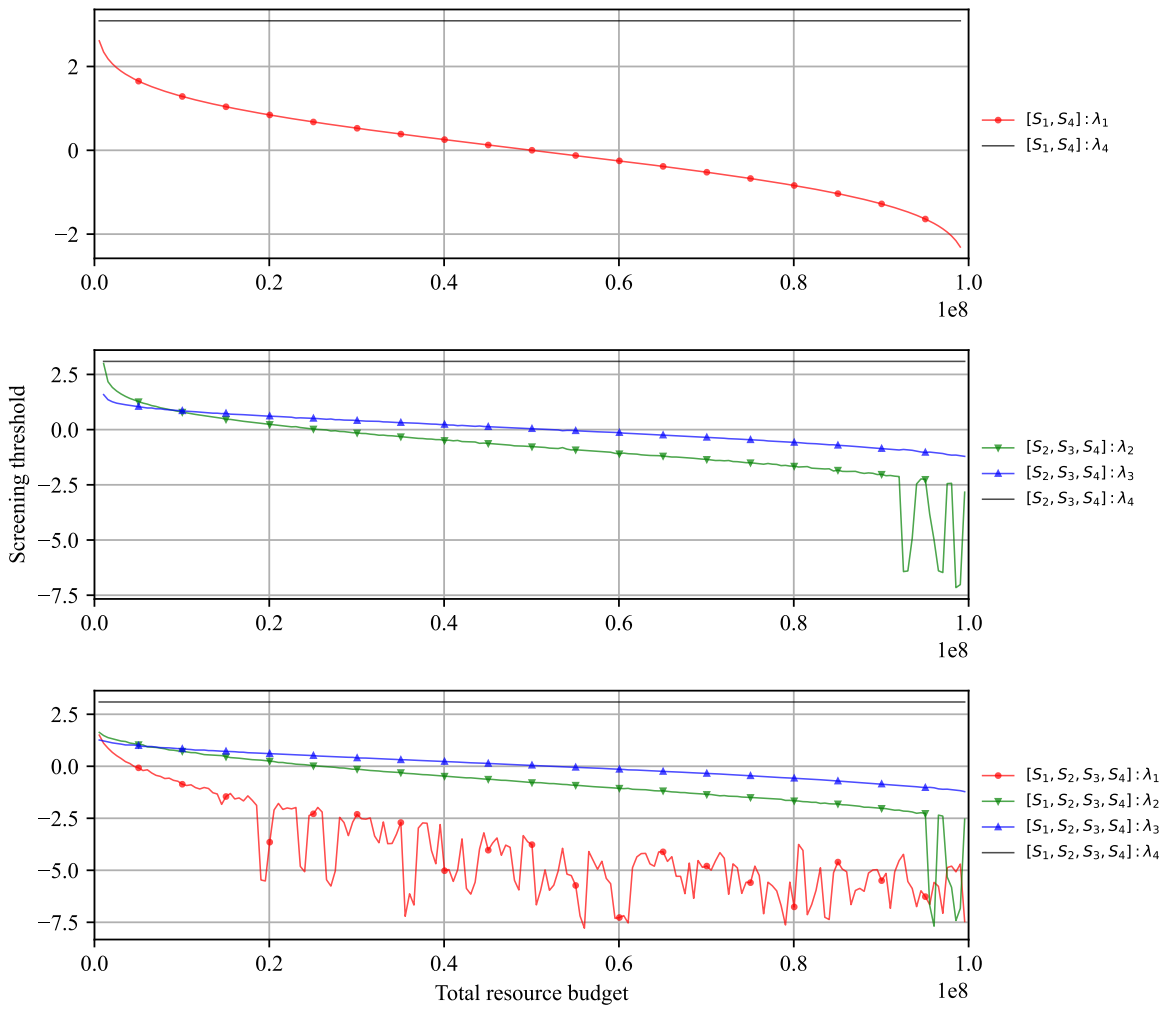

Figure S38: Screening thresholds of the optimized pipelines.

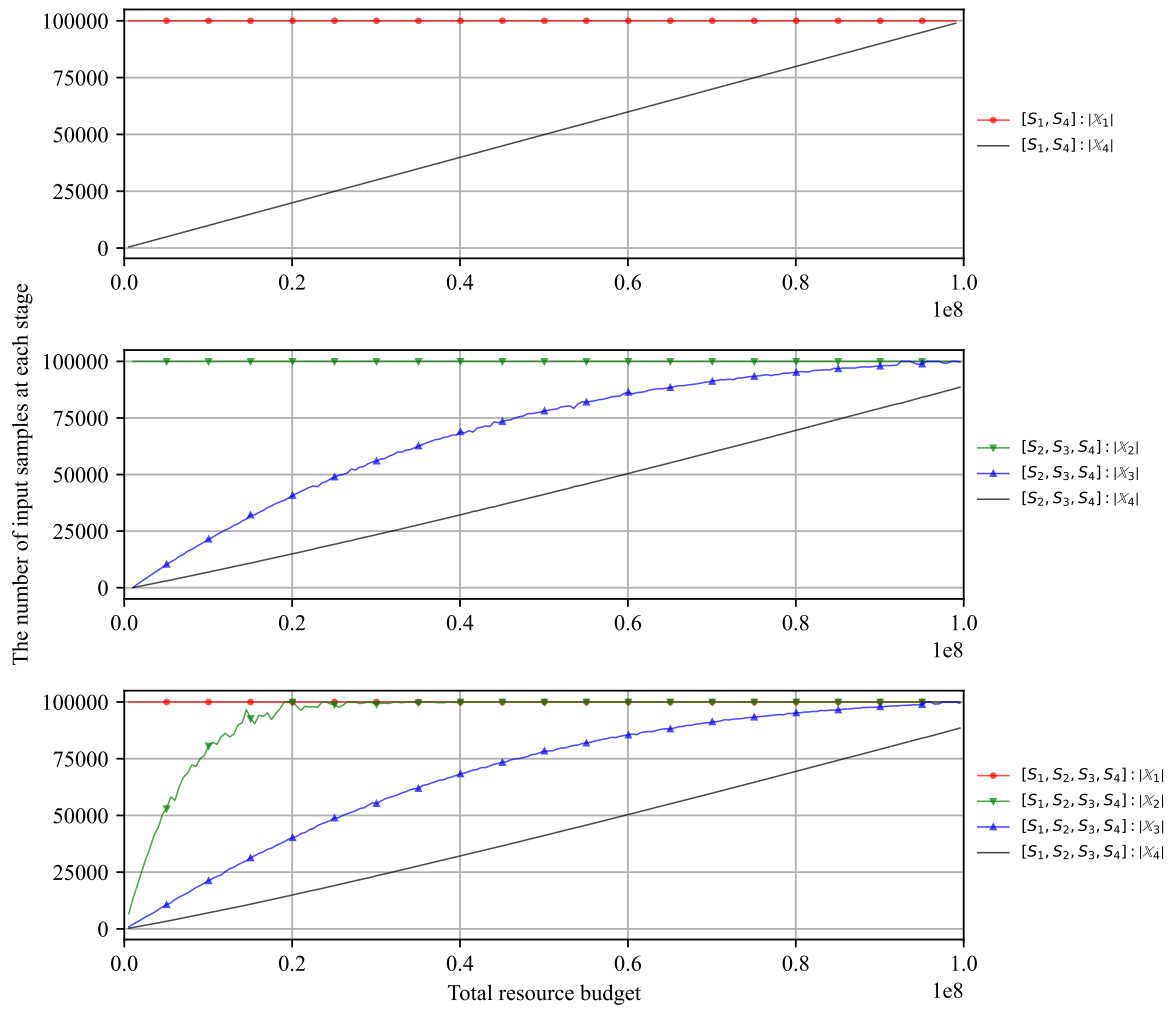

Figure S39: The number of input samples at each stage.



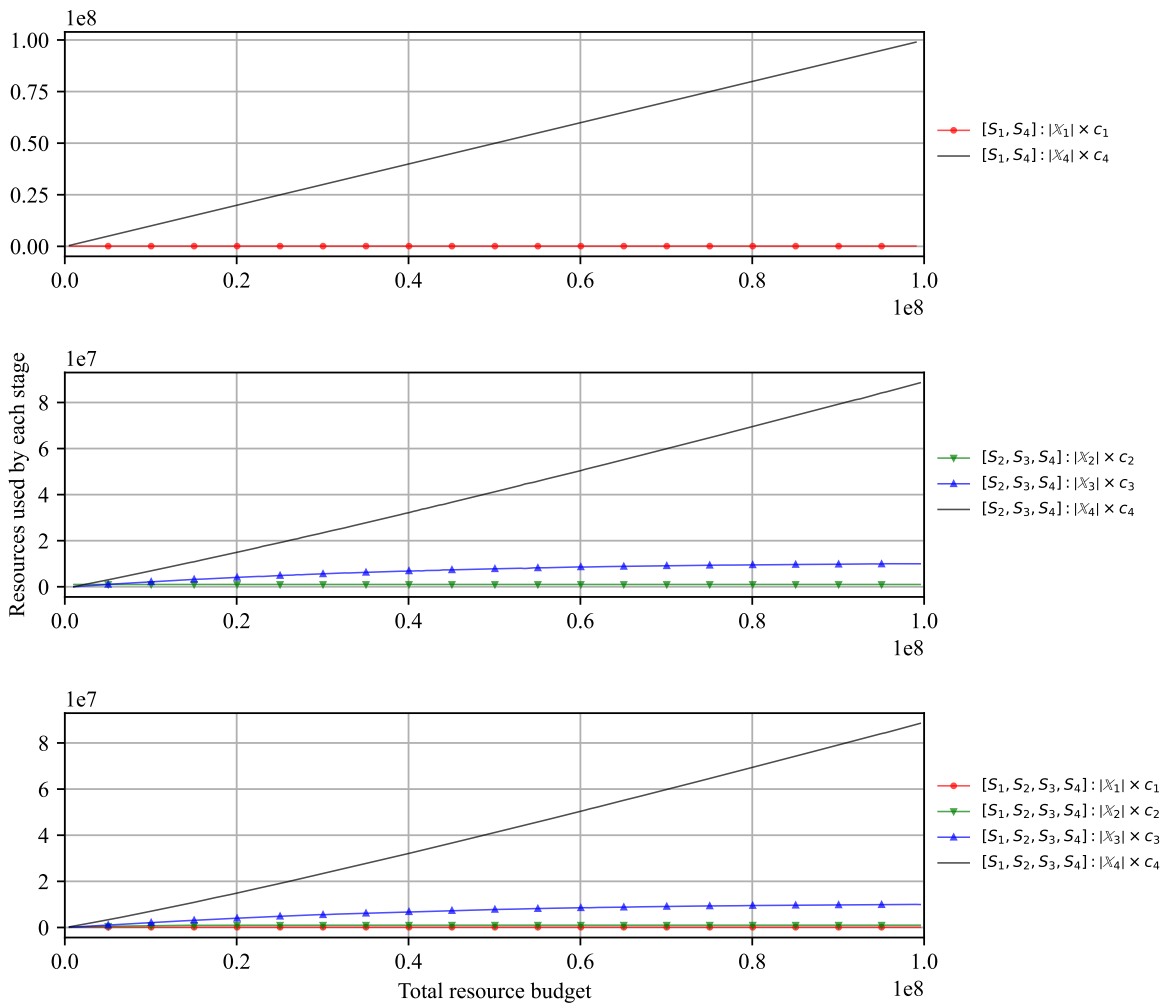

Figure S40: Resources used by each stage.

$$p(y_1, y_2, y_3, y_4) \sim \mathcal{N} \left( \boldsymbol{\mu} = \mathbf{0}, \boldsymbol{\Sigma} = \begin{bmatrix} 1 & 0.8 & 0.7 & 0.6 \\ 0.8 & 1 & 0.8 & 0.7 \\ 0.7 & 0.8 & 1 & 0.8 \\ 0.6 & 0.7 & 0.8 & 1 \end{bmatrix} \right) \quad (11)$$

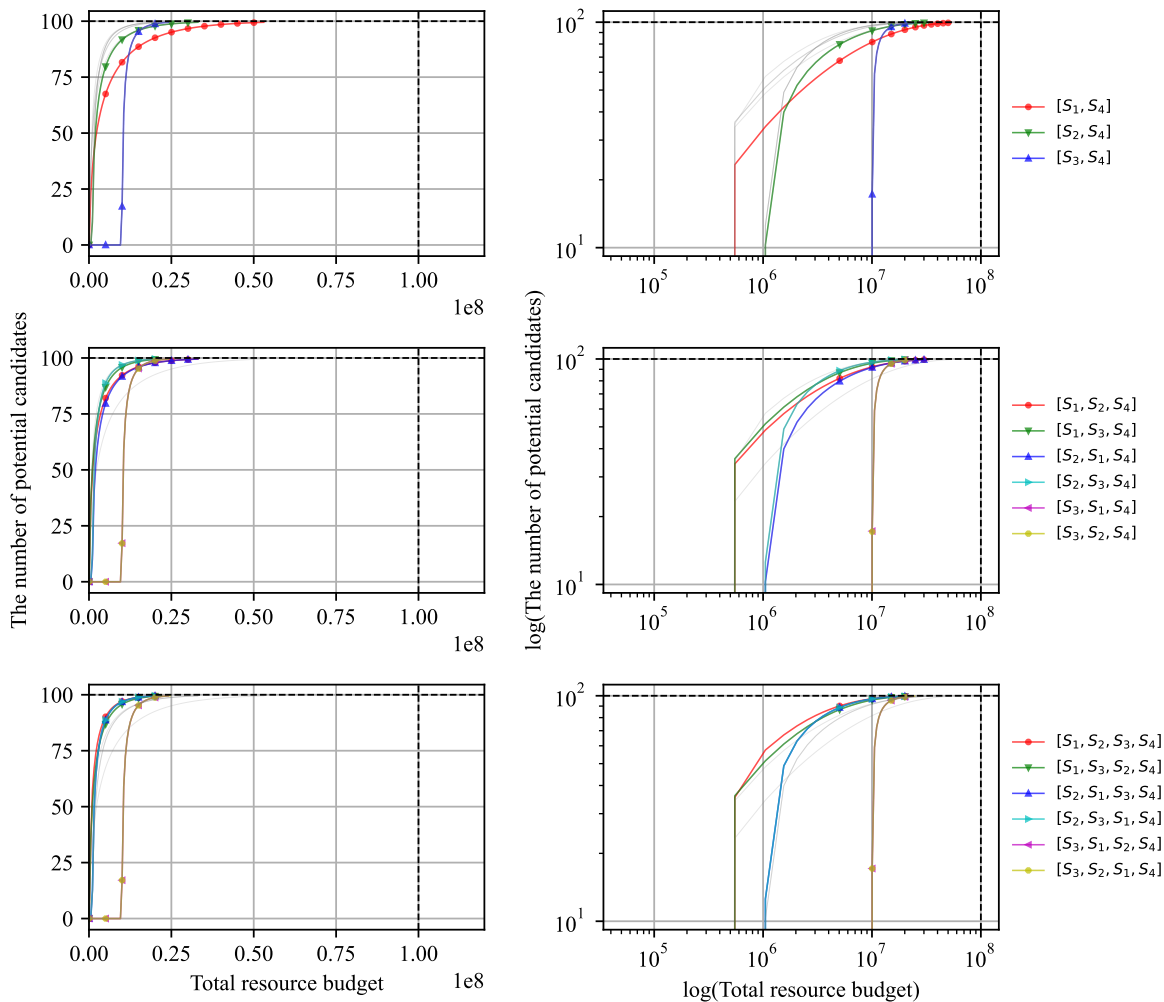

Figure S41: Performance comparison of the optimized high-throughput virtual screening pipelines in terms of discovery capability.

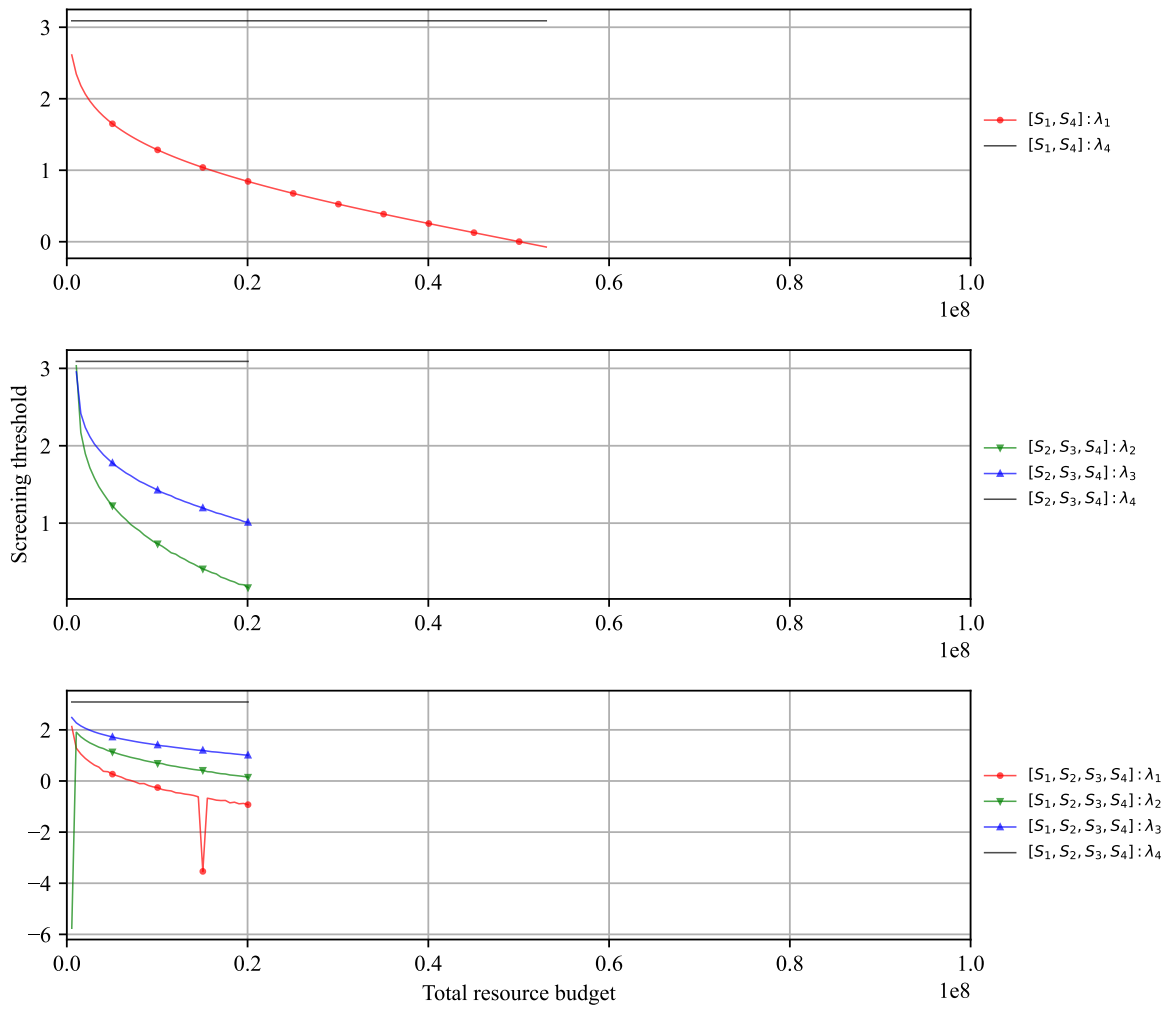

Figure S42: Screening thresholds of the optimized pipelines.

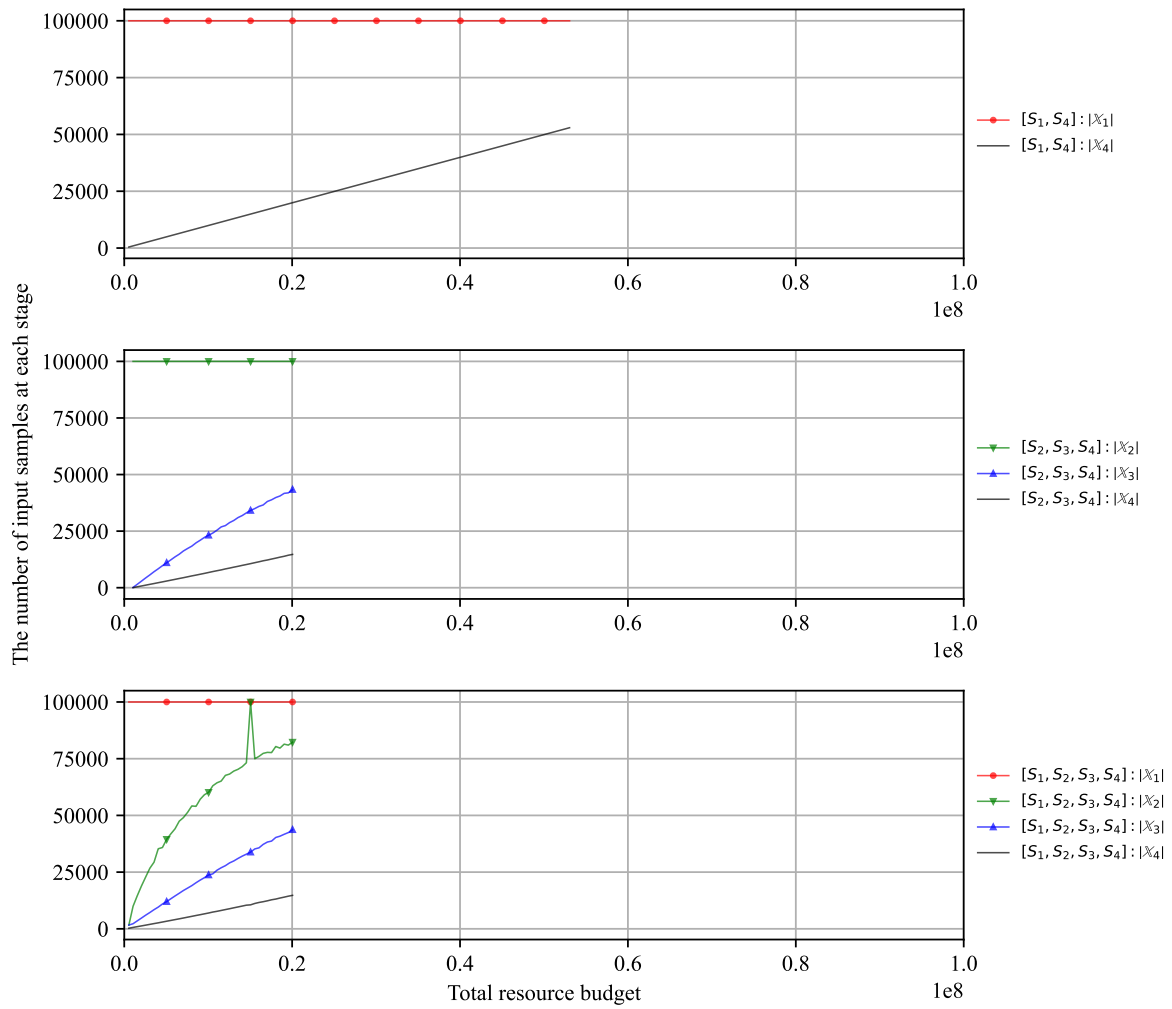

Figure S43: The number of input samples at each stage.

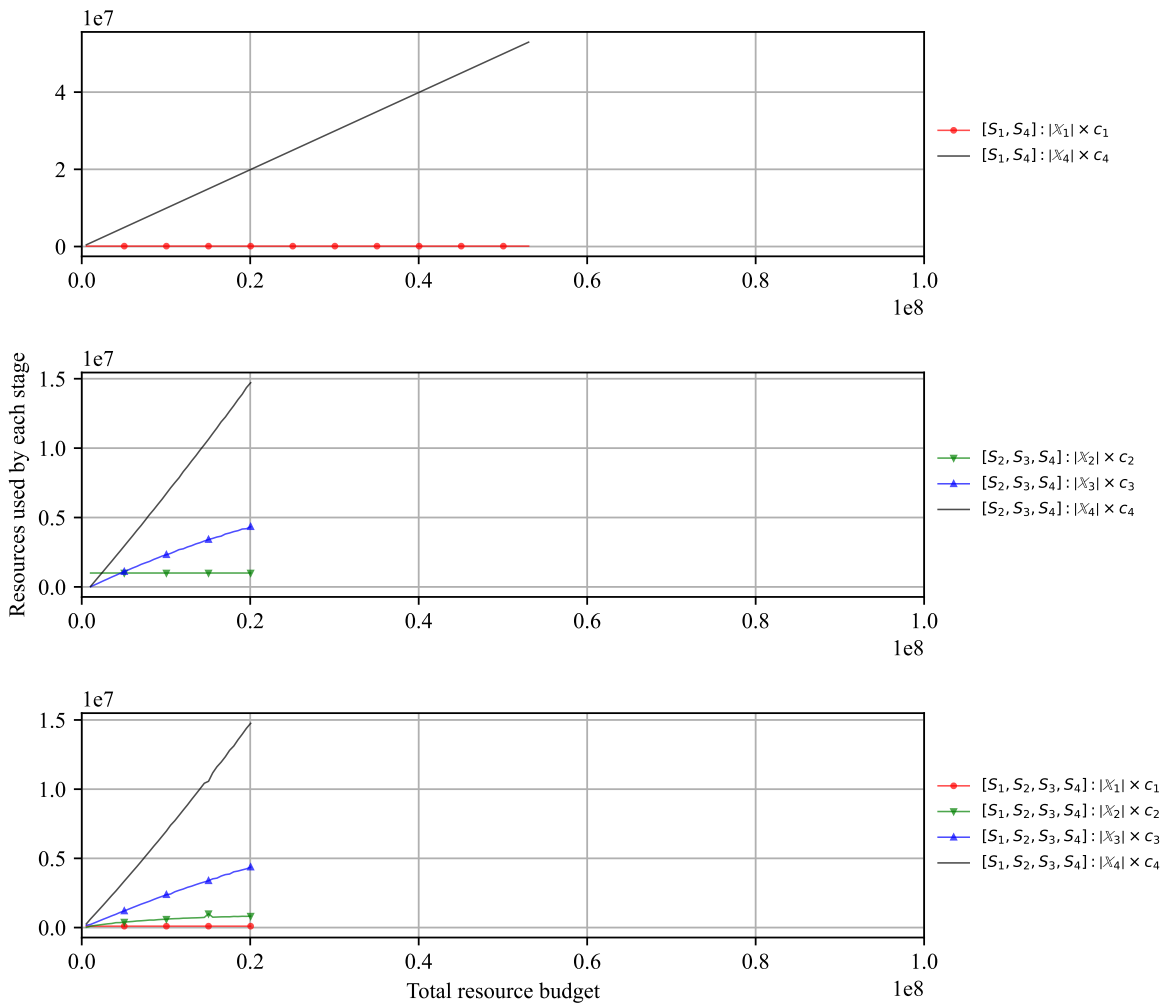

Figure S44: Resources used by each stage.

# Performance evaluations of high-throughput virtual screening pipelines for identifying long non-coding RNAs

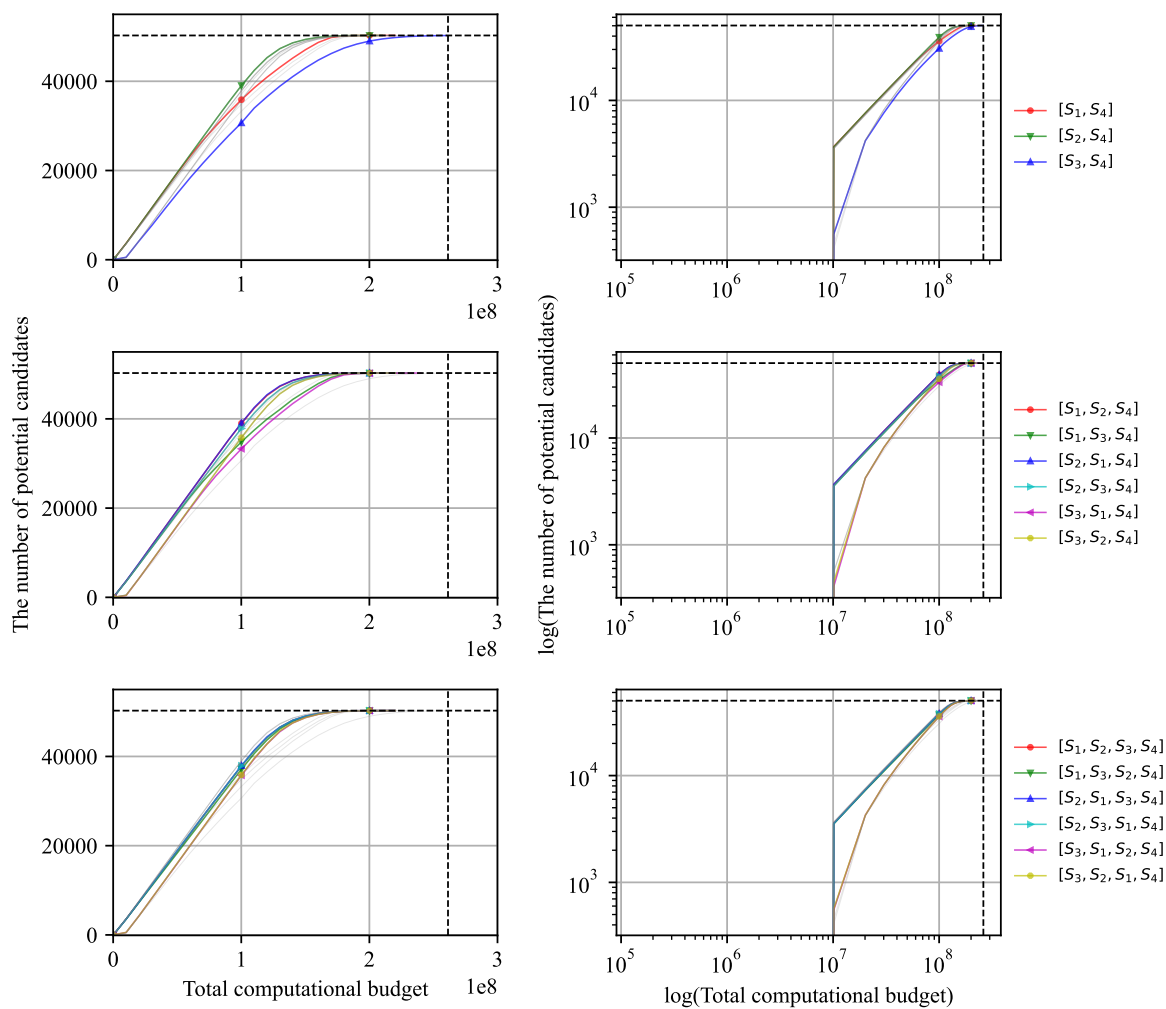

Figure S45: Performance comparison of the optimized high-throughput virtual screening pipelines in terms of discovery capability.

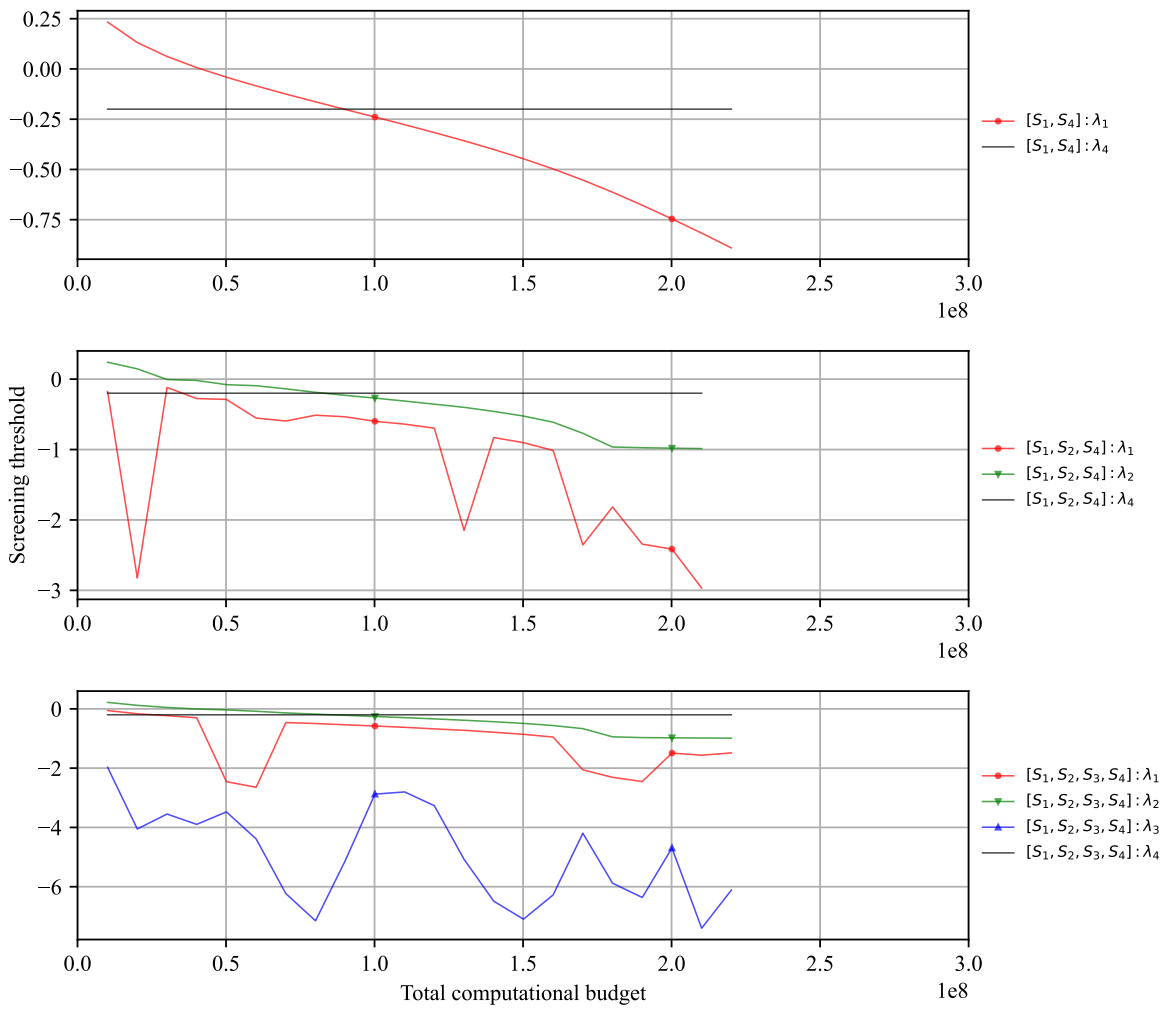

Figure S46: Screening thresholds of the optimized pipelines.

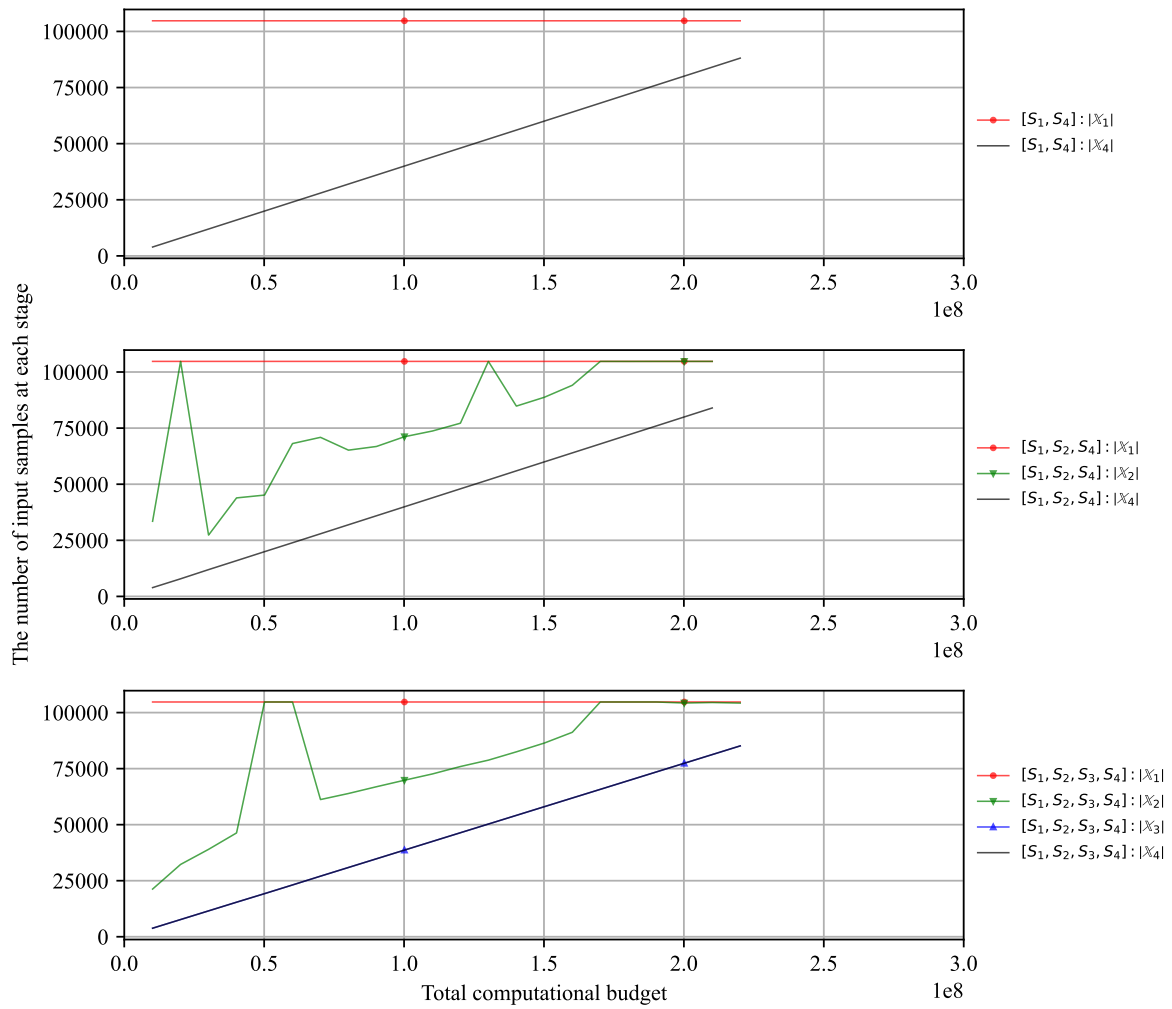

Figure S47: The number of input samples at each stage.



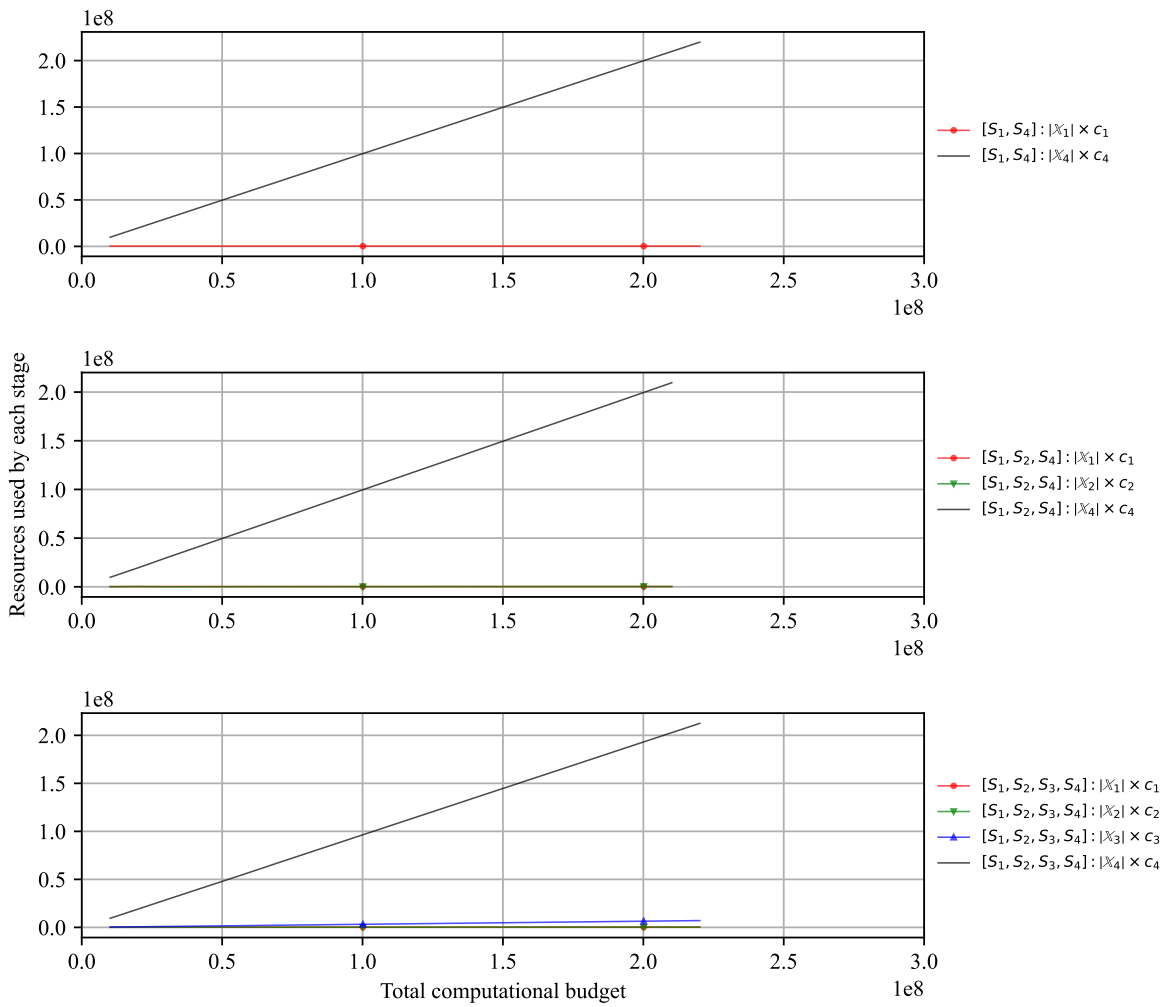

Figure S48: Resources used by each stage.
